# Supplementary material for: Novel Insect Antifeedant and Ixodicidal Nootkatone Derivatives
Source: PubMed Central journal article supplement (PMC6921050; doi:10.3390/biom9110742), 2019-11-16

# Novel insect antifeedant and ixodicidal nootkatone derivatives

Alberto Galisteo Pretel<sup>1</sup>, Helena Pérez del Pulgar<sup>1</sup>, A. Sonia Olmeda<sup>2</sup>, Azucena Gonzalez-Coloma<sup>3</sup>, Alejandro F. Barrero<sup>1,\*</sup> and José Francisco Quílez del Moral<sup>1,\*</sup>

<sup>1</sup> Department of Organic Chemistry, Institute of Biotechnology, University of Granada, 18071 Granada, Spain; [albertogapre@ugr.es](mailto:albertogapre@ugr.es) (A.G.); [helenaperezpv@ugr.es](mailto:helenaperezpv@ugr.es) (H.P.P.)

<sup>2</sup> Faculty of Veterinary, Complutense University of Madrid (UCM), 28040 Madrid, Spain; [angeles@ucm.es](mailto:angeles@ucm.es) (A.S.O.)

<sup>3</sup> Institute of Agricultural Sciences, CSIC, 28006, Madrid, Spain; [azu@ica.csic.es](mailto:azu@ica.csic.es) (A.G.C.)

\* Correspondence: [afbarre@ugr.es](mailto:afbarre@ugr.es); [jfquilez@ugr.es](mailto:jfquilez@ugr.es); Tel.: +34-958243185

## List of contents

NMR spectra

2-24

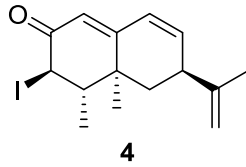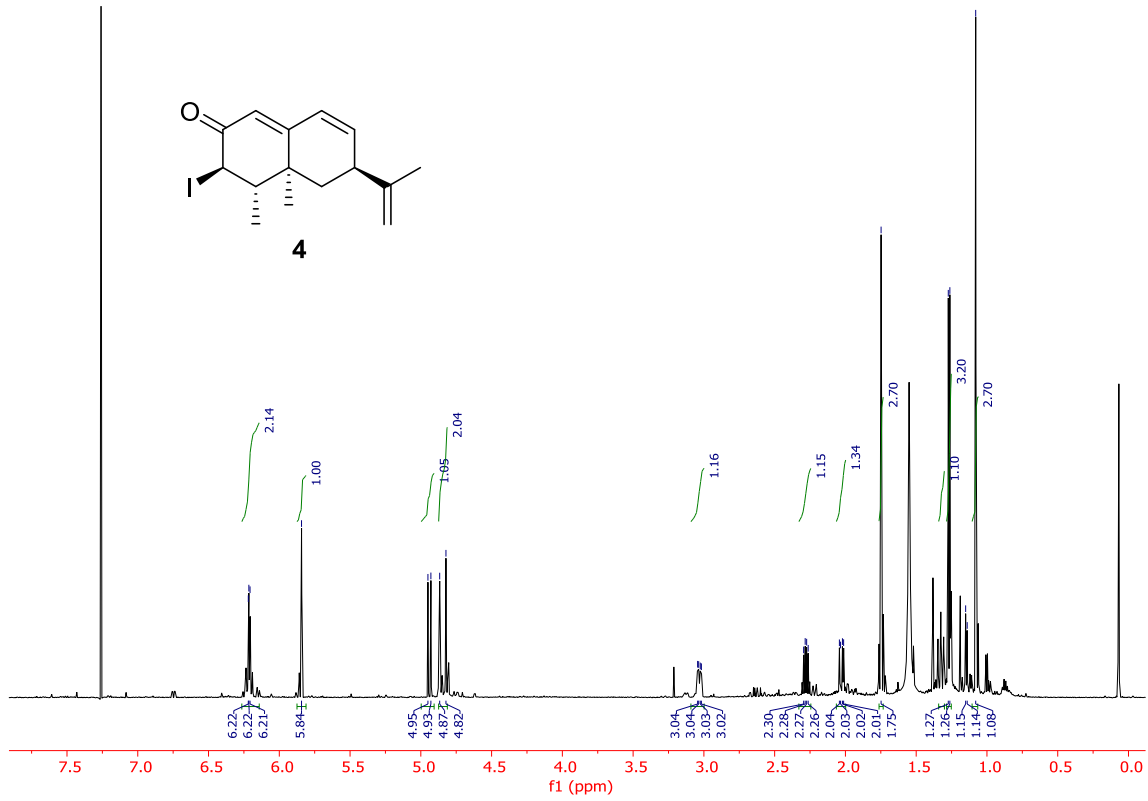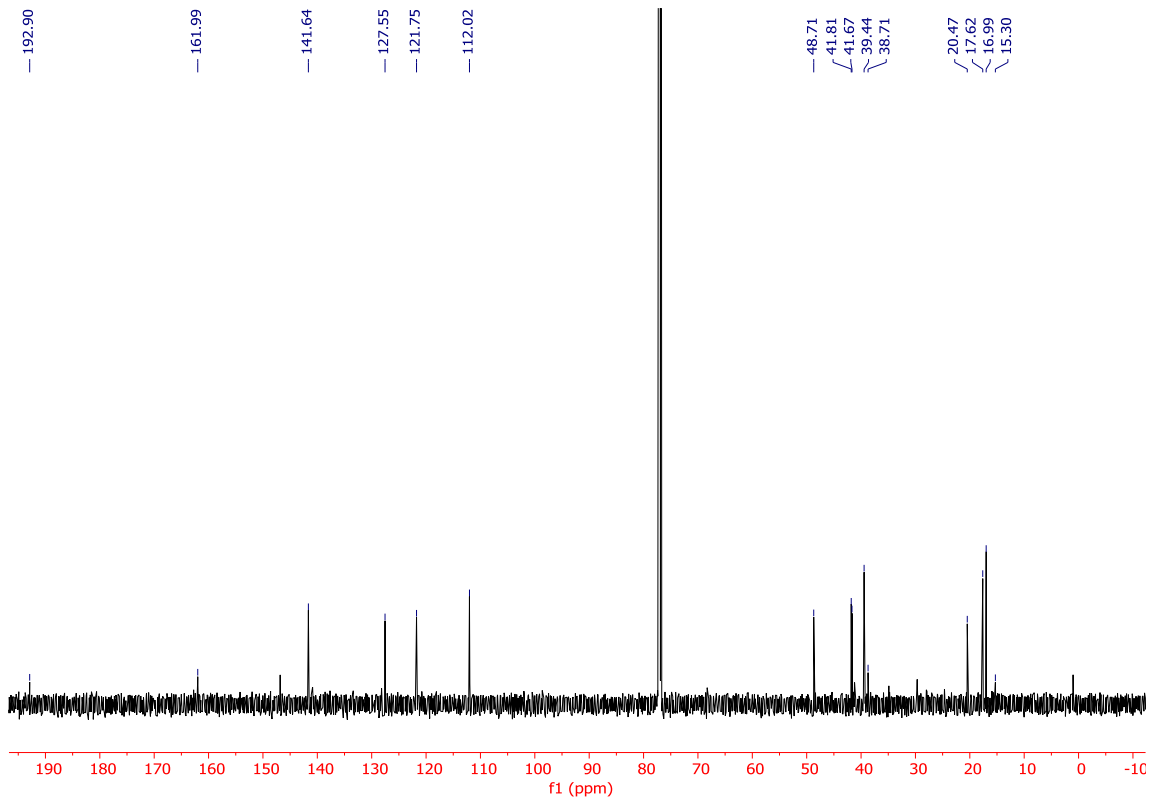

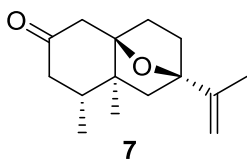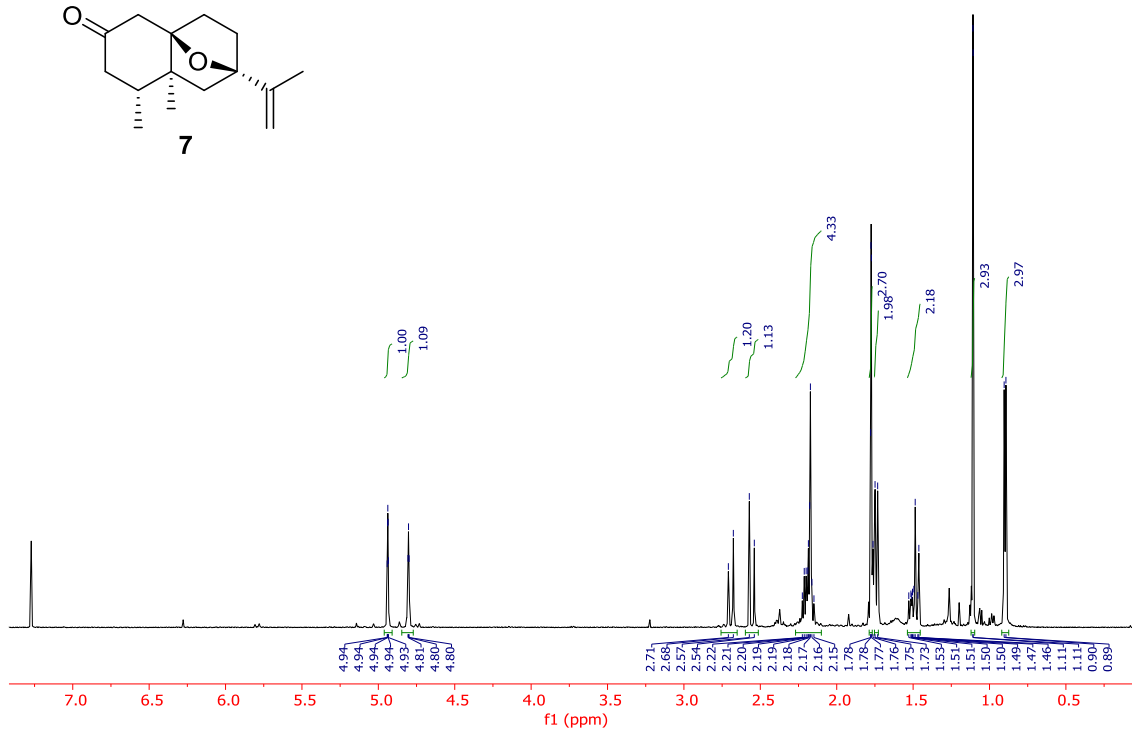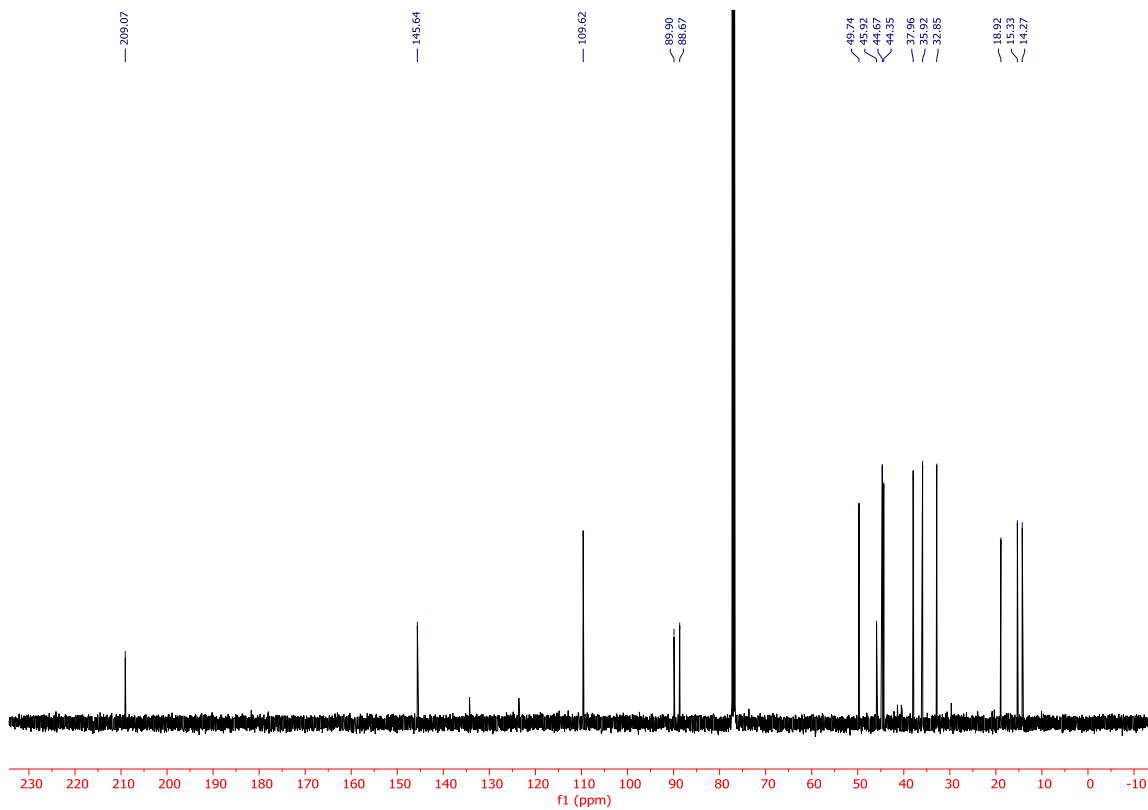

**TOCSY**

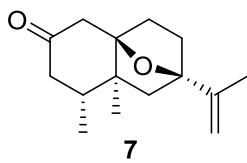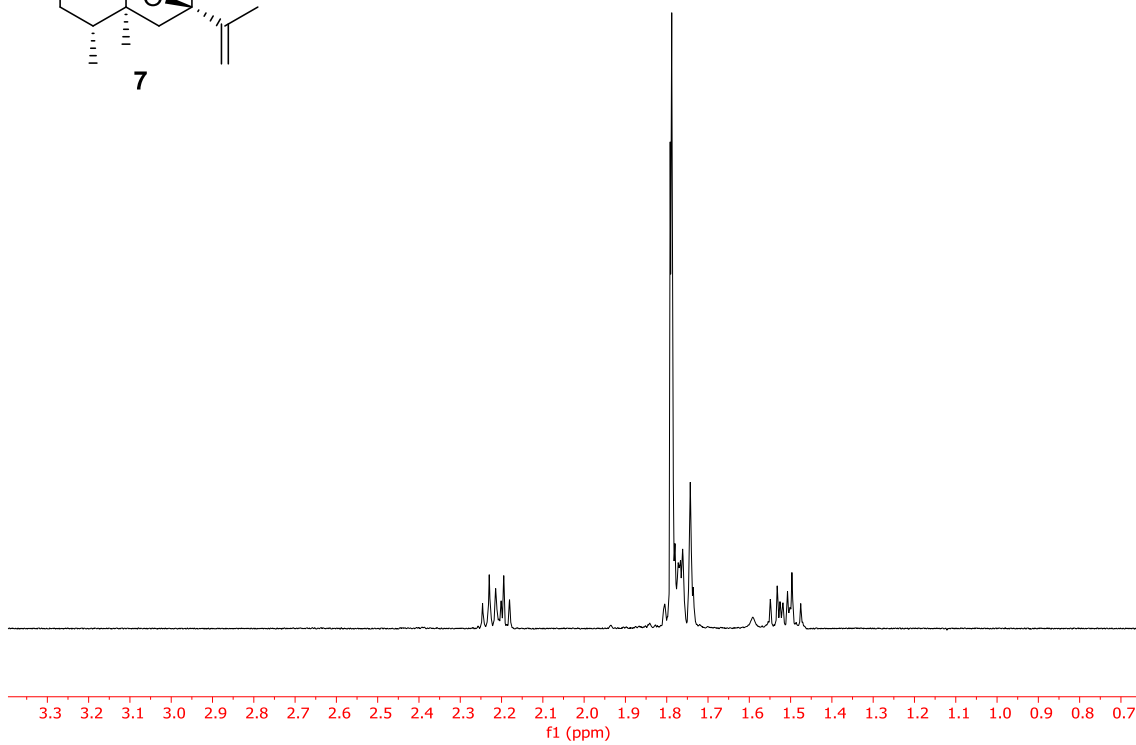

**NOESY**

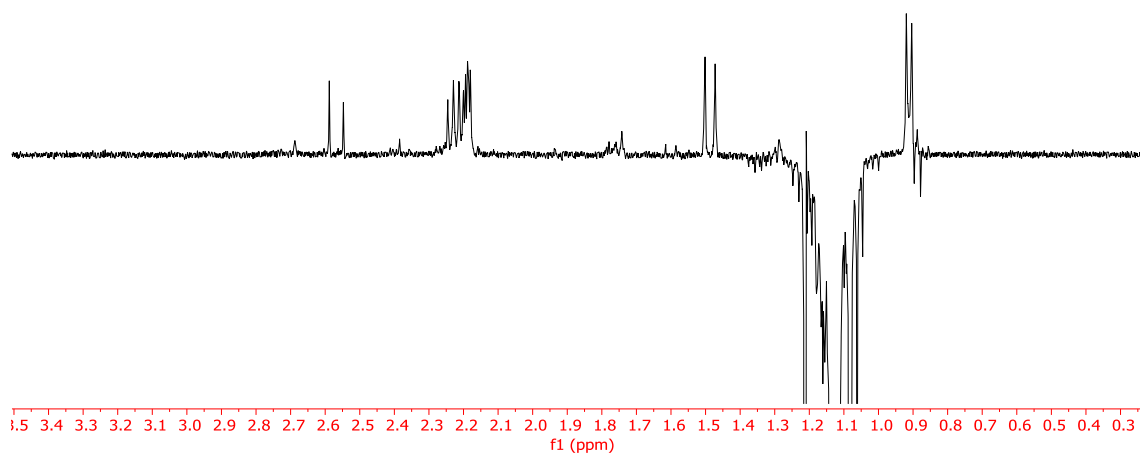

NOESY

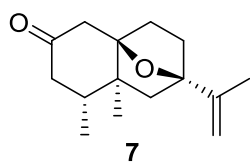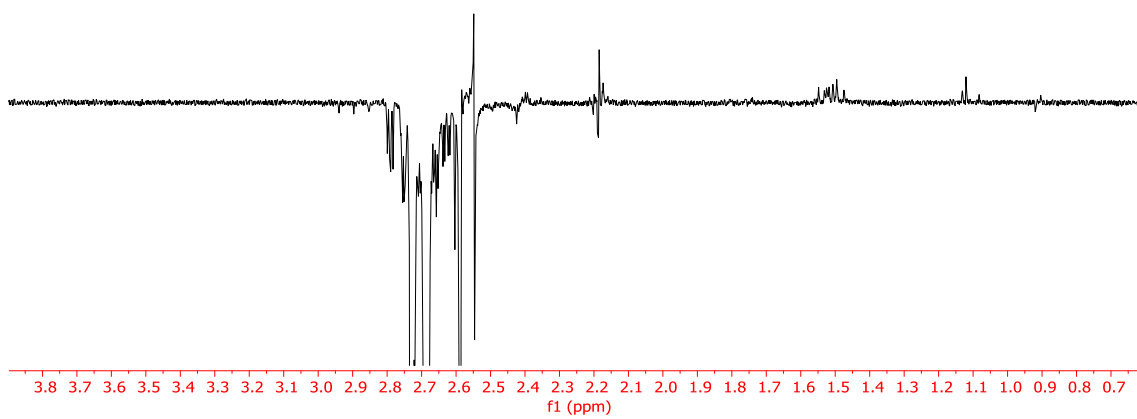

NOESY

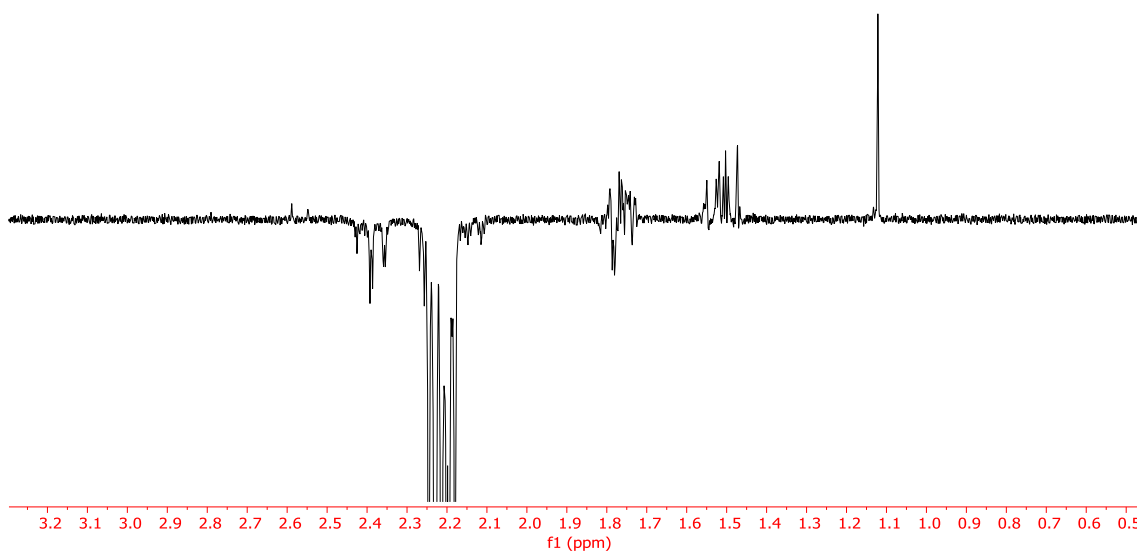

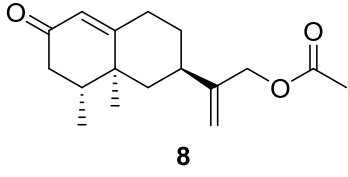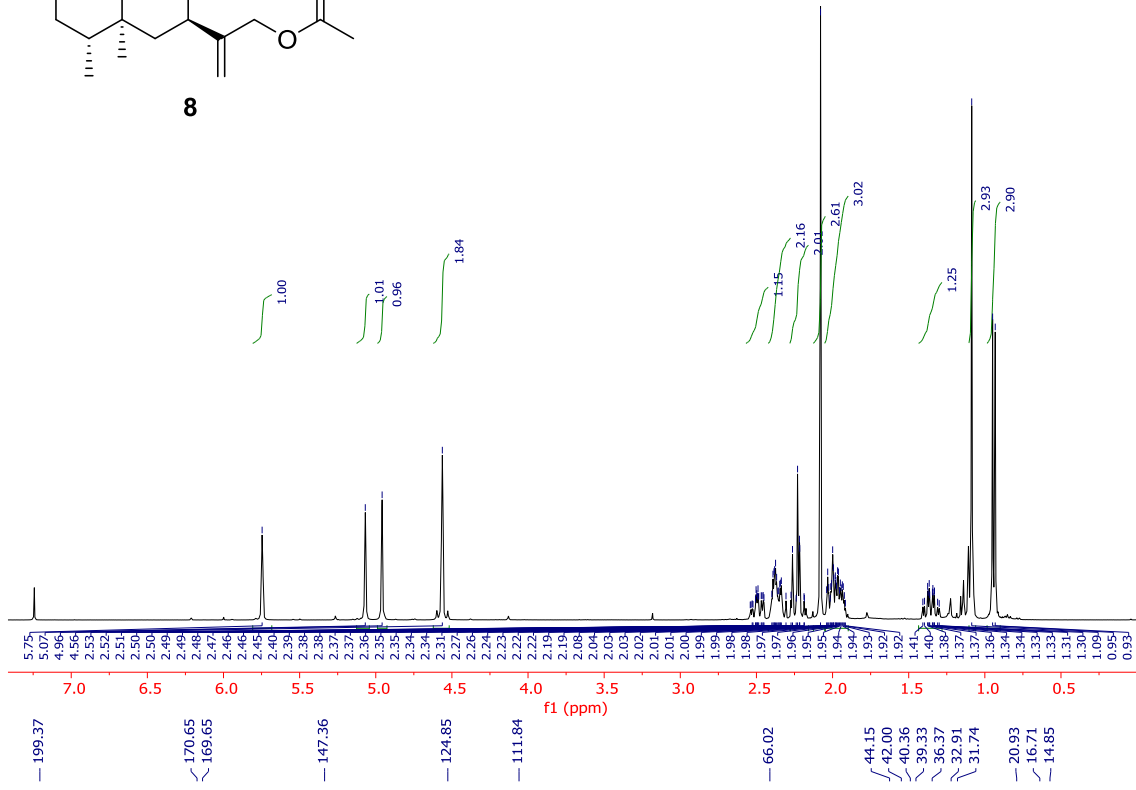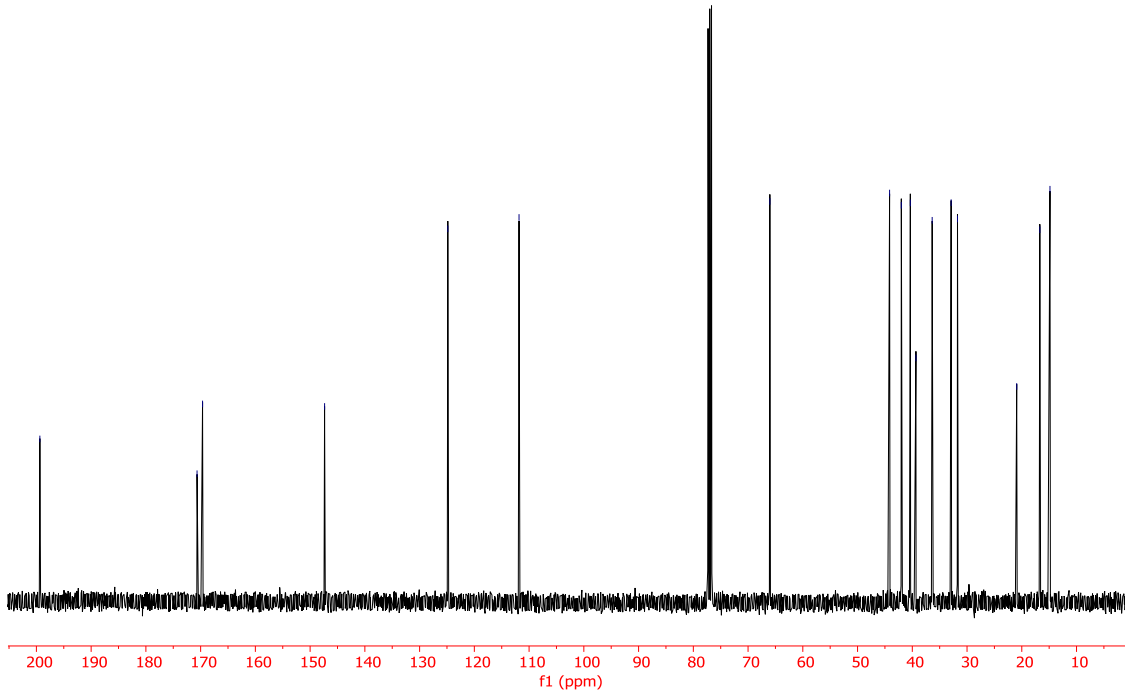

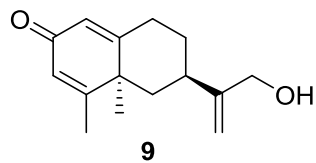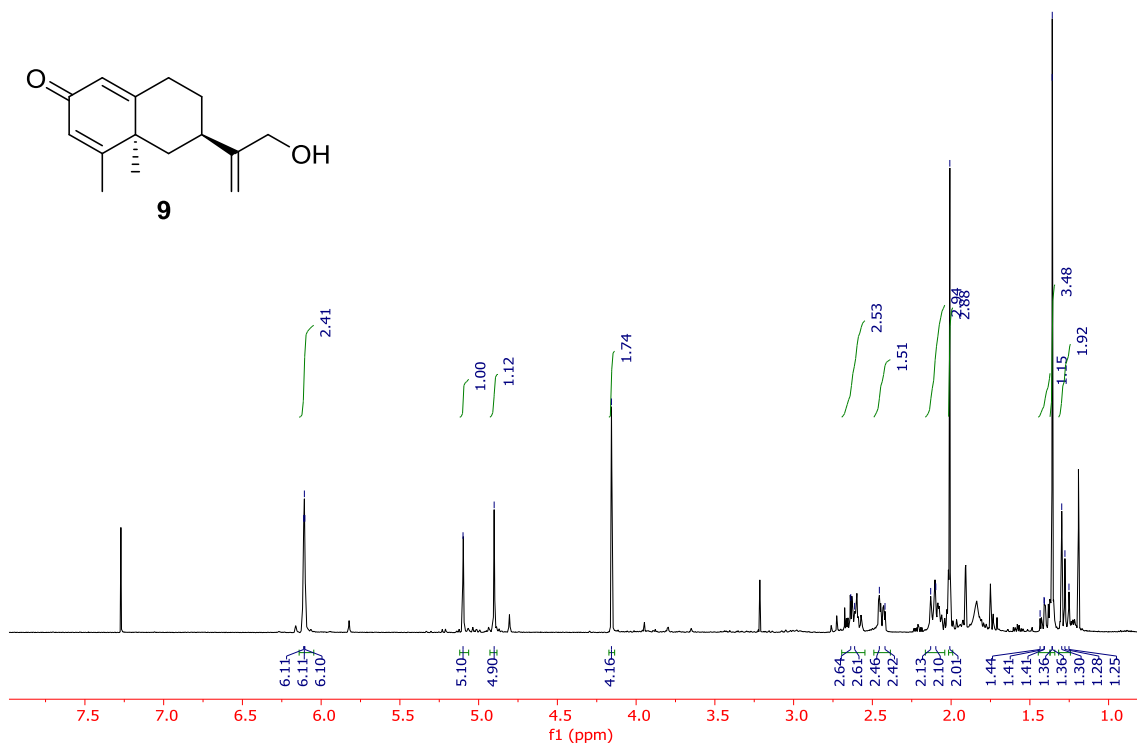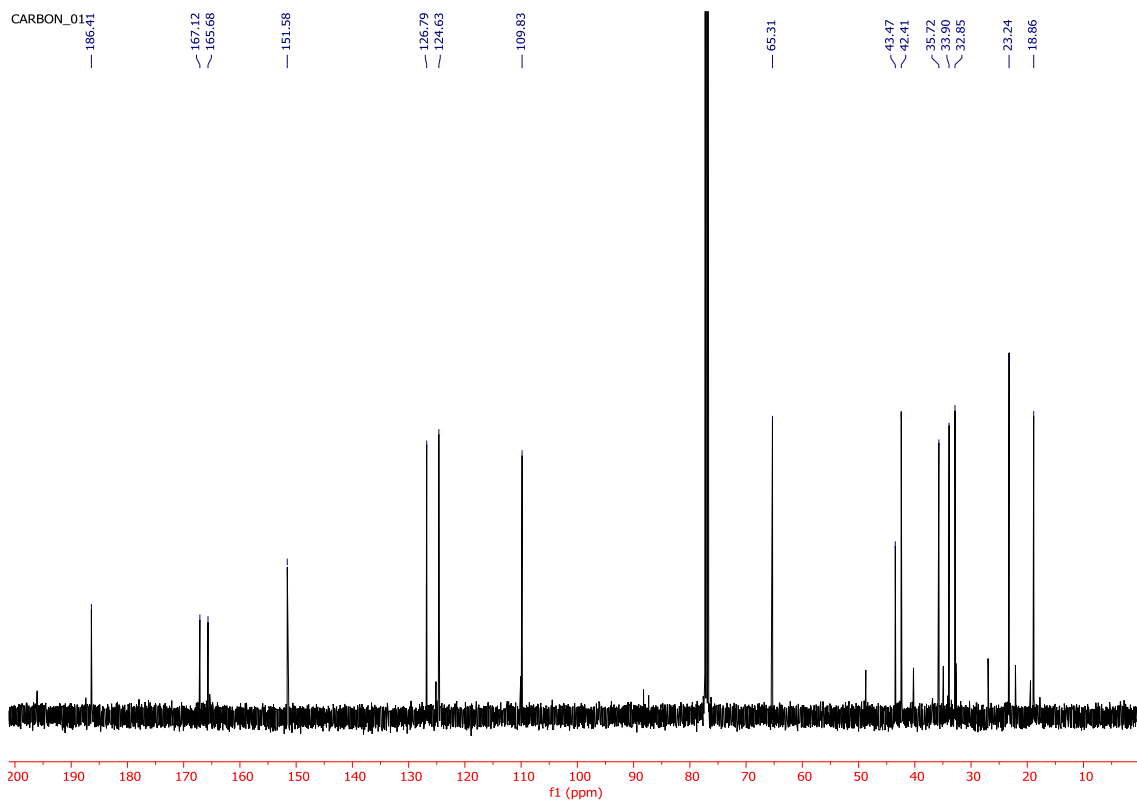

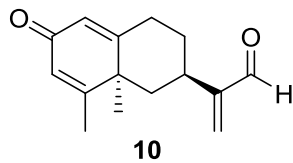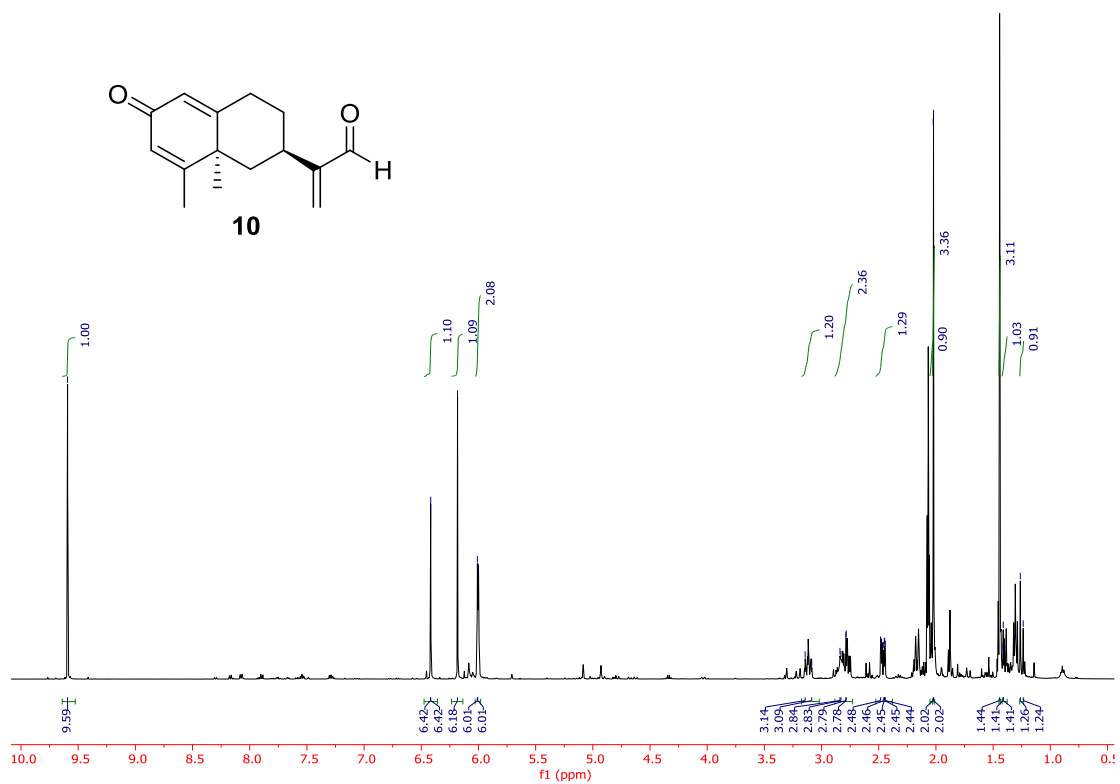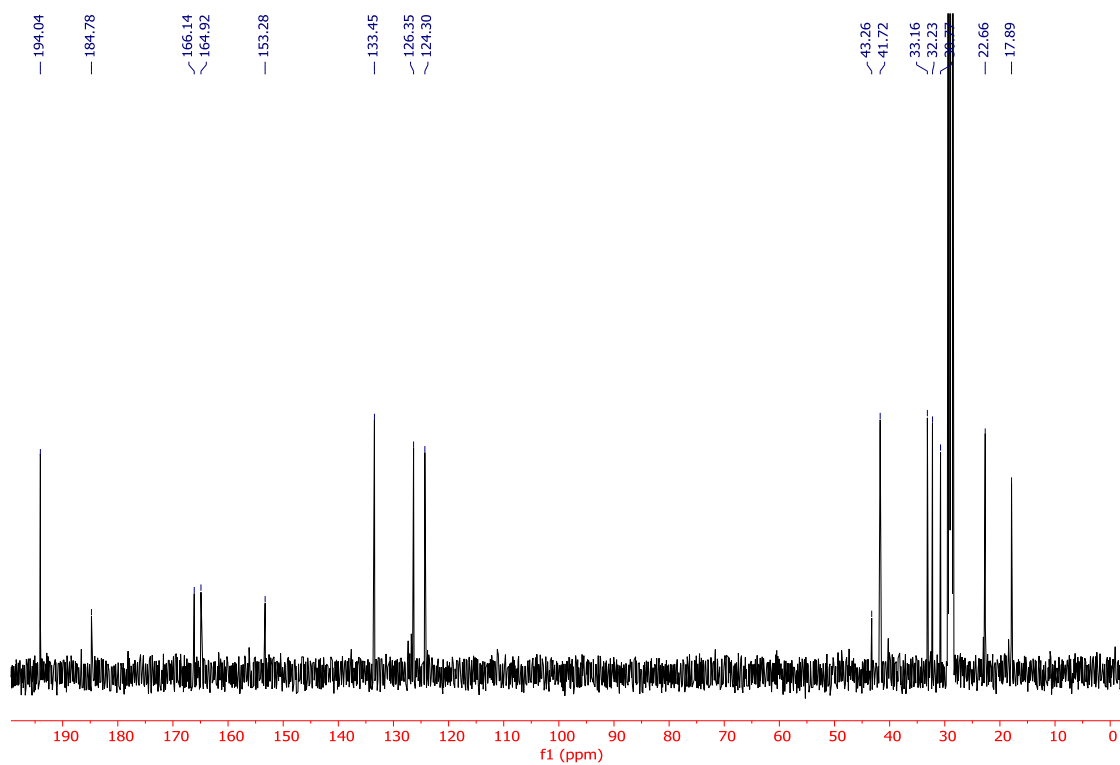



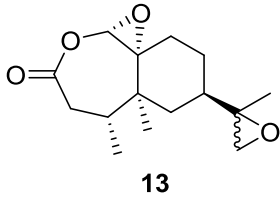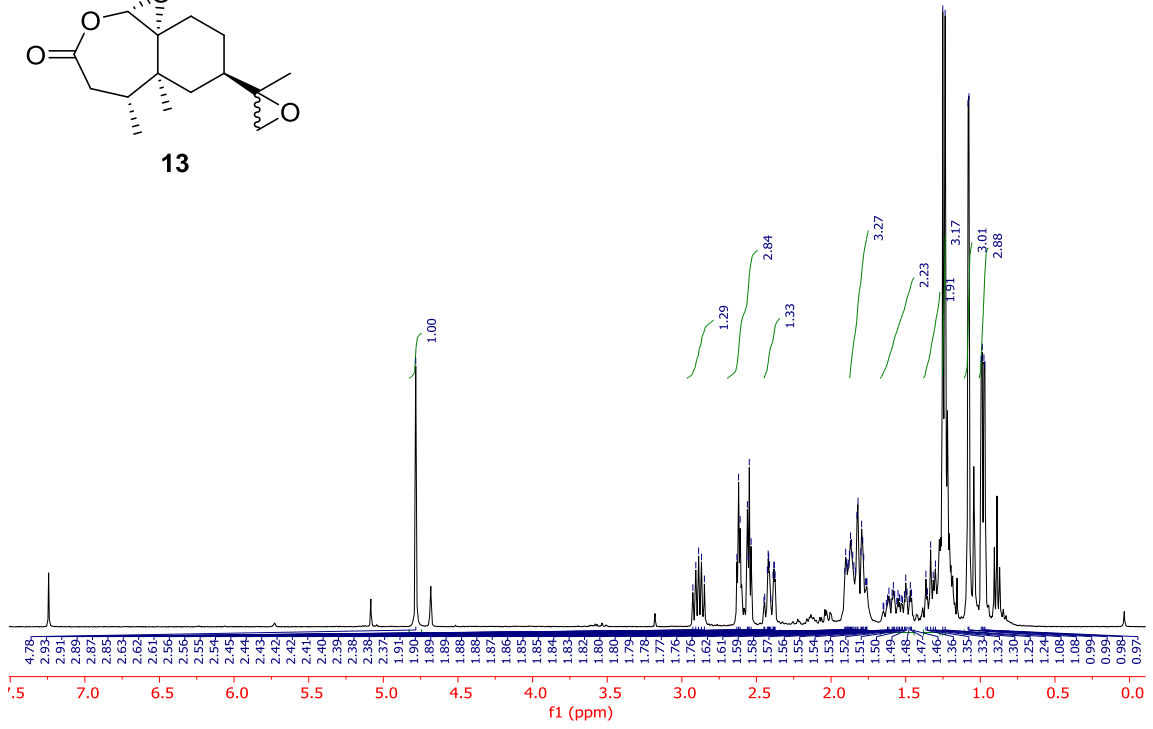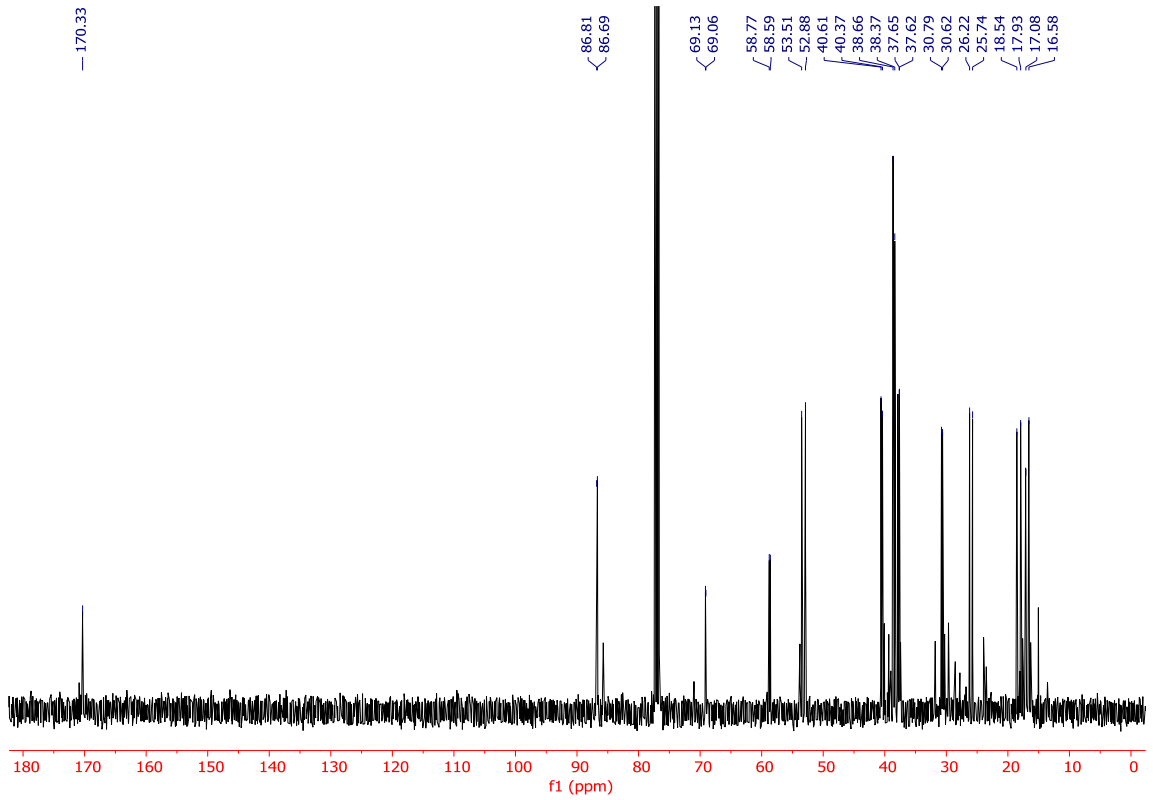

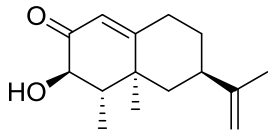

14

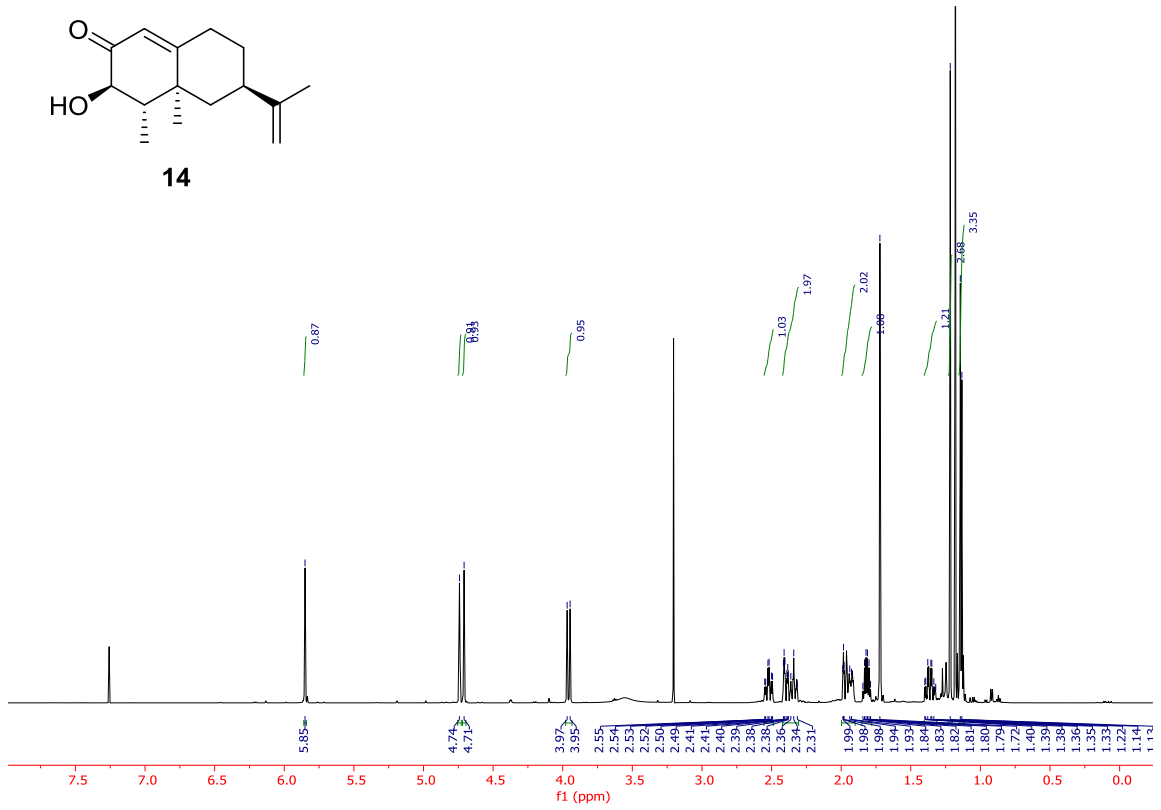

199.67

172.10

148.65

120.99

109.47

73.41

47.63

44.18

40.92

39.61

33.15

31.76

20.76

17.80

10.82

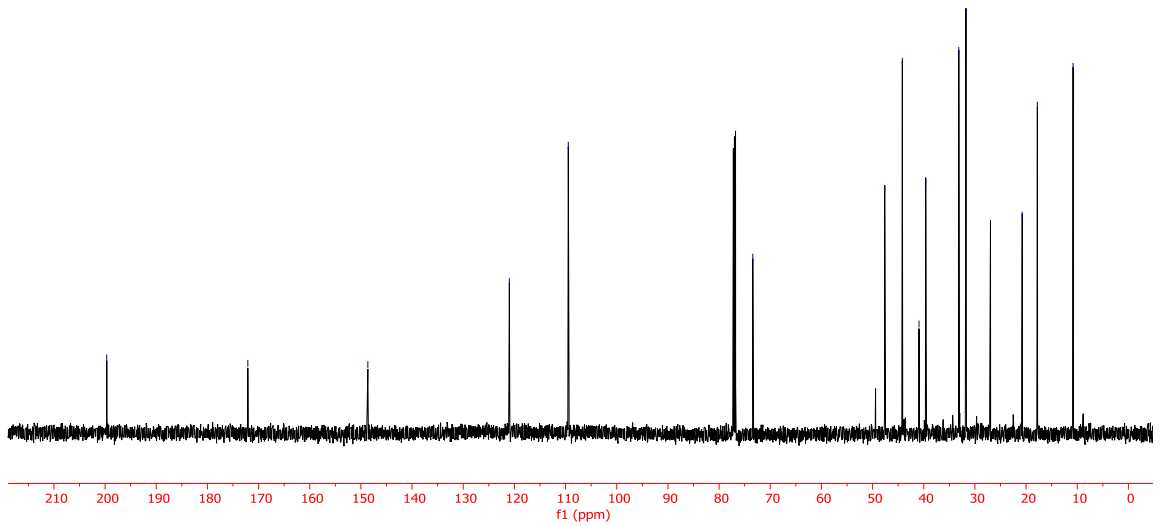

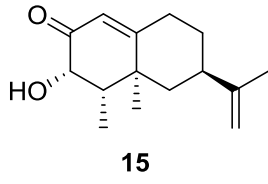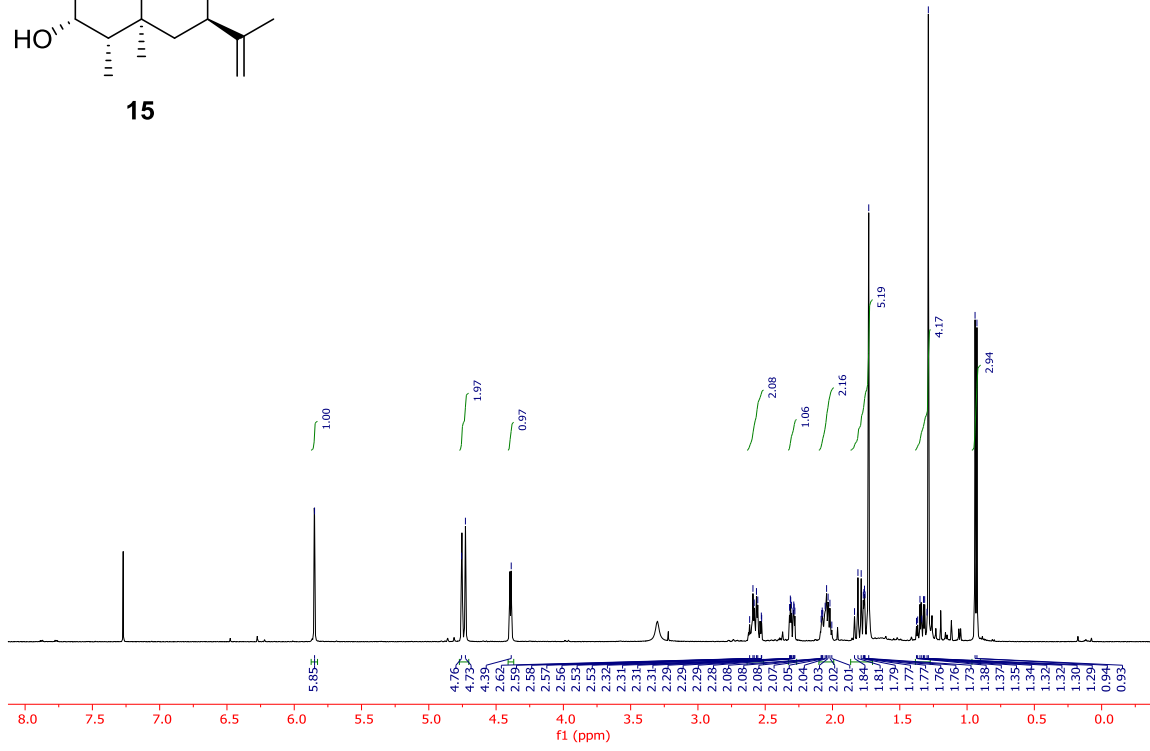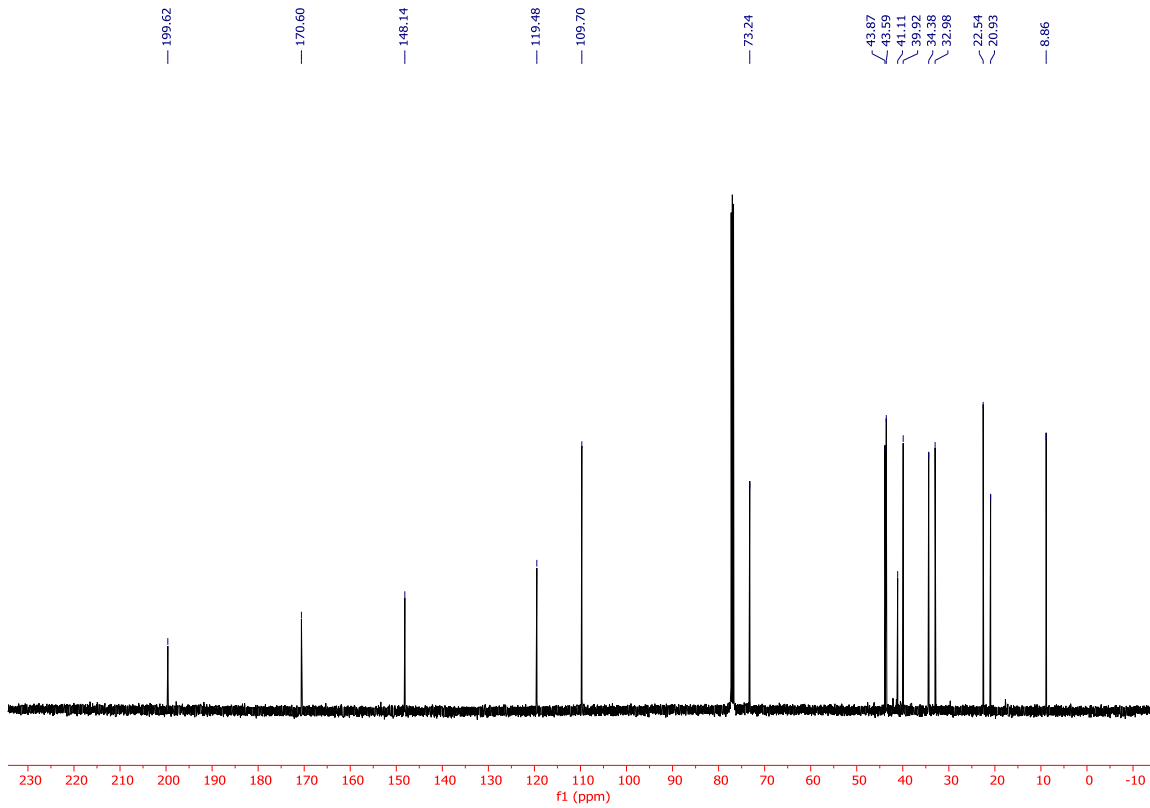

NOEDIFF

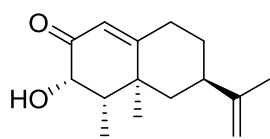

15

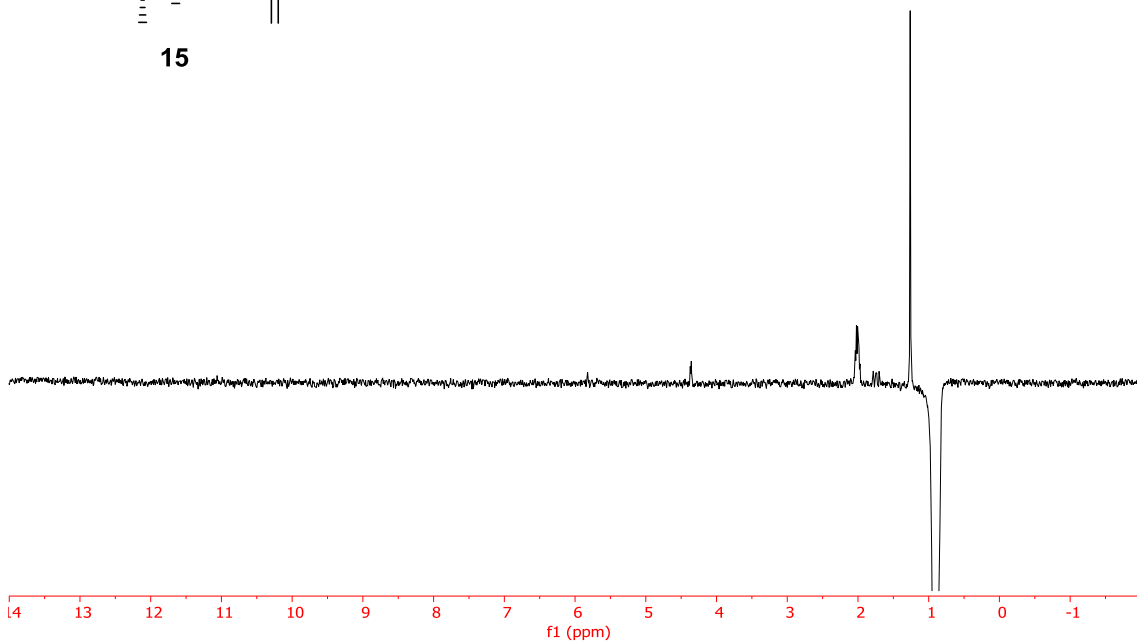

NOEDIFF

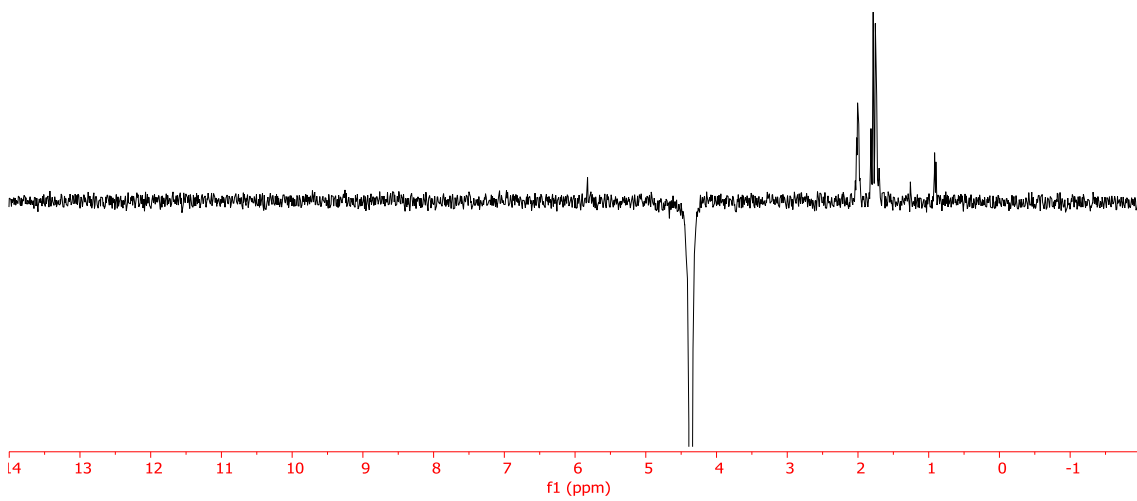

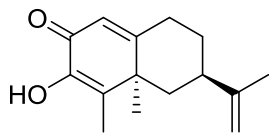

16

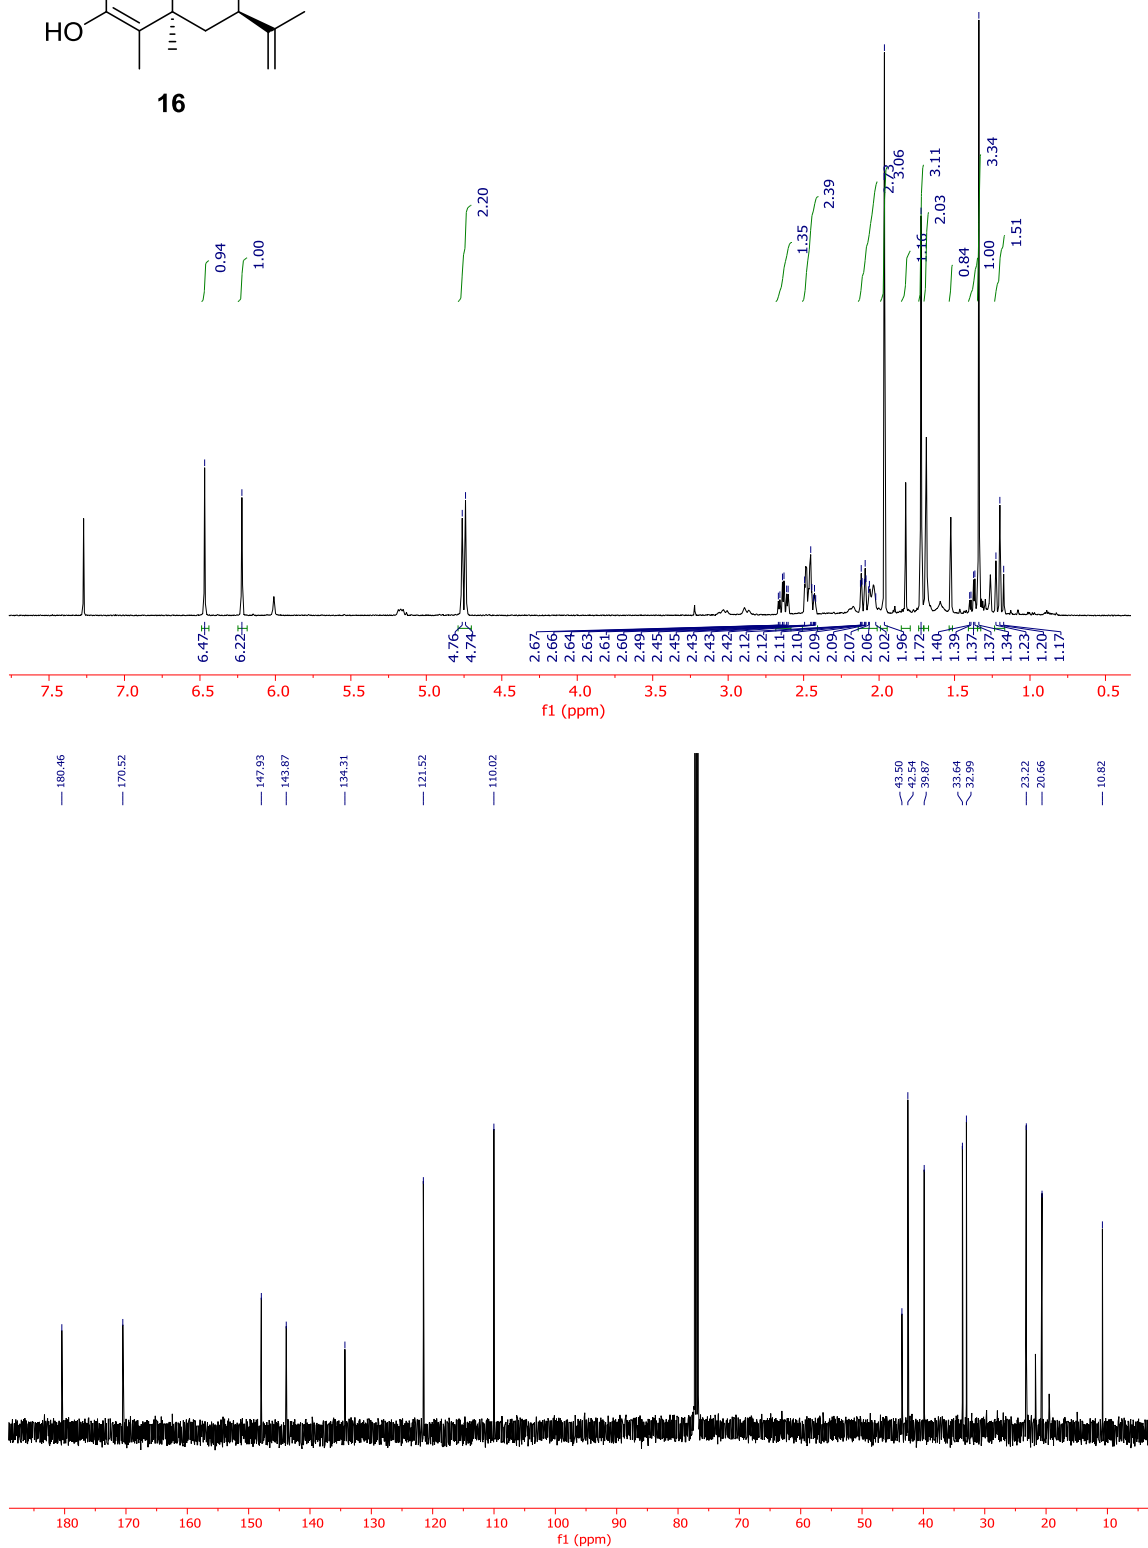

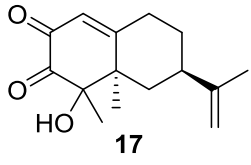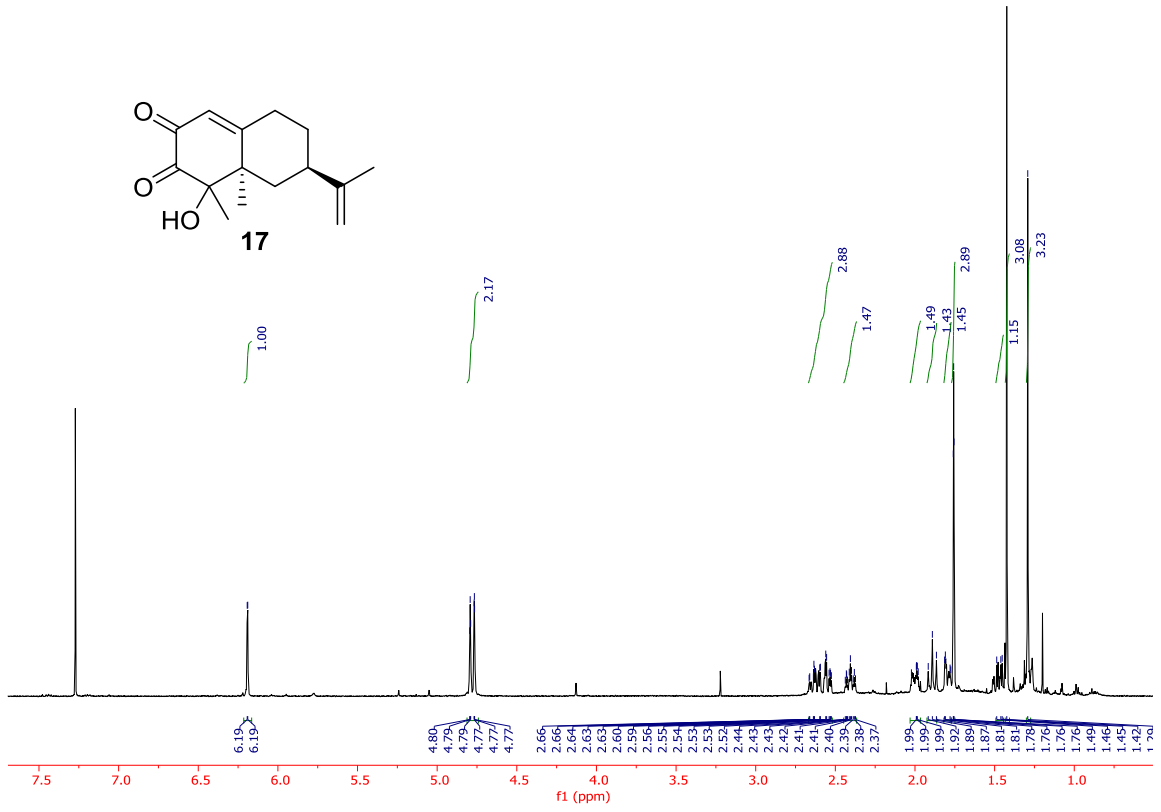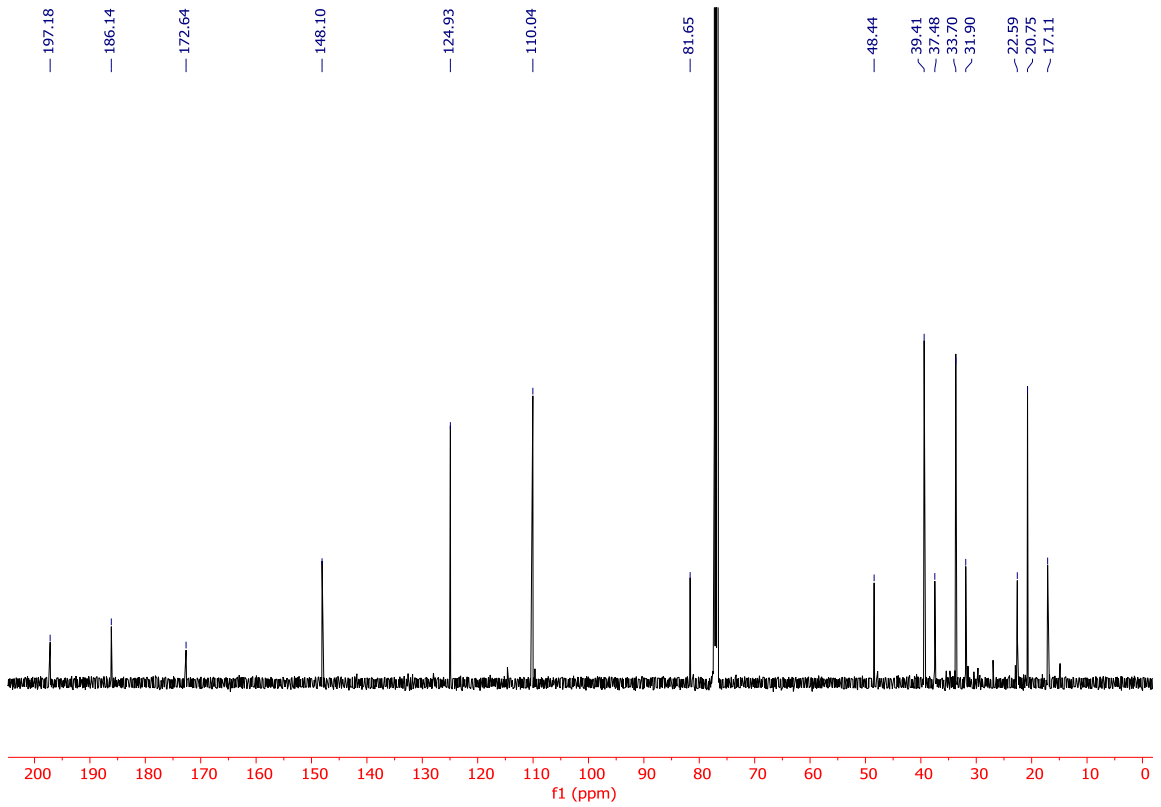

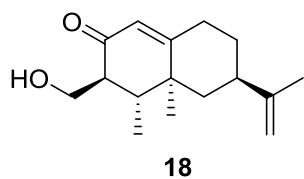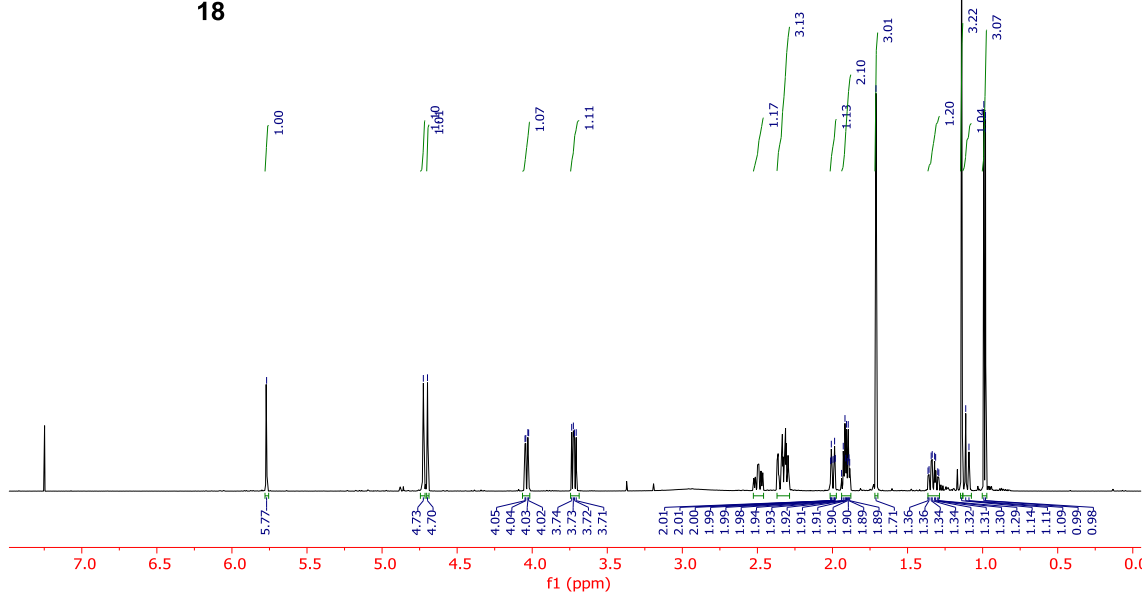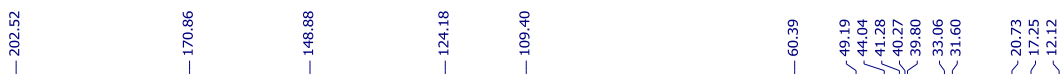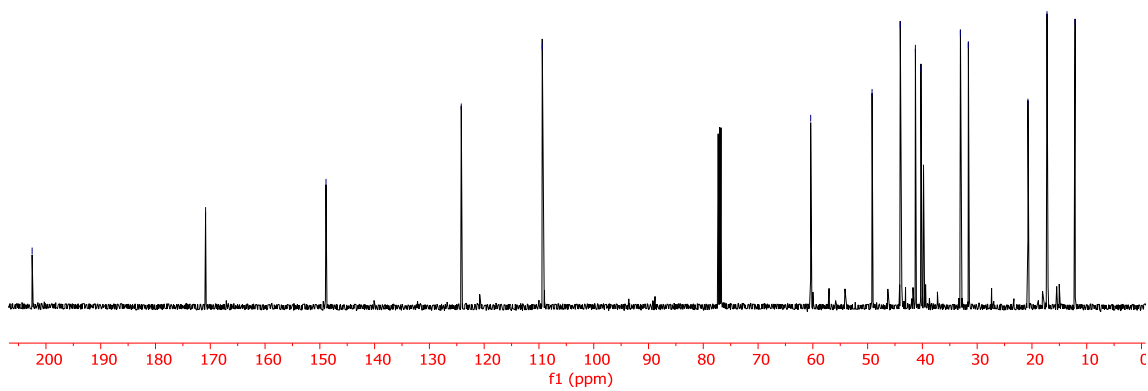

## TOCSY

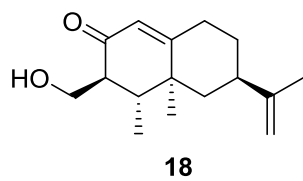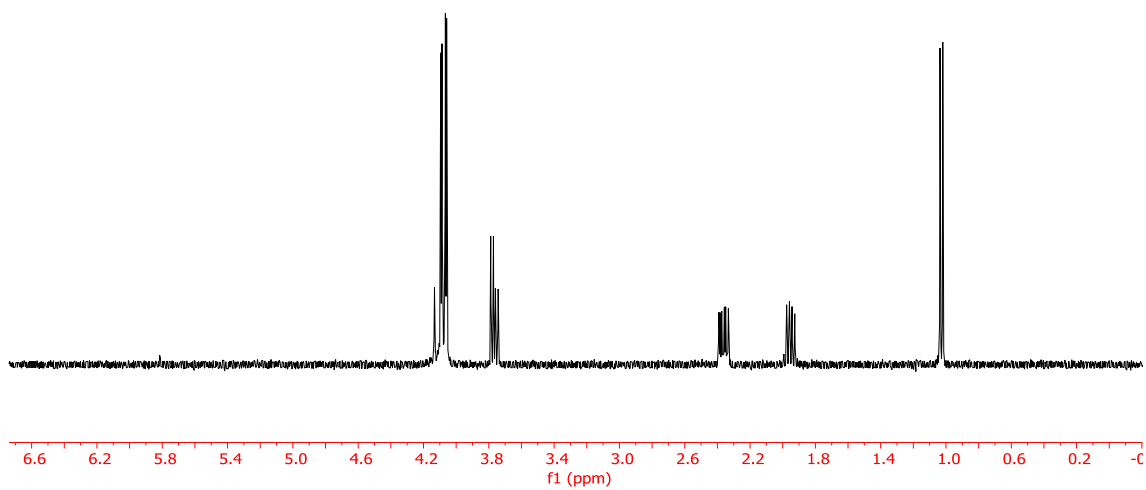

## NOESY

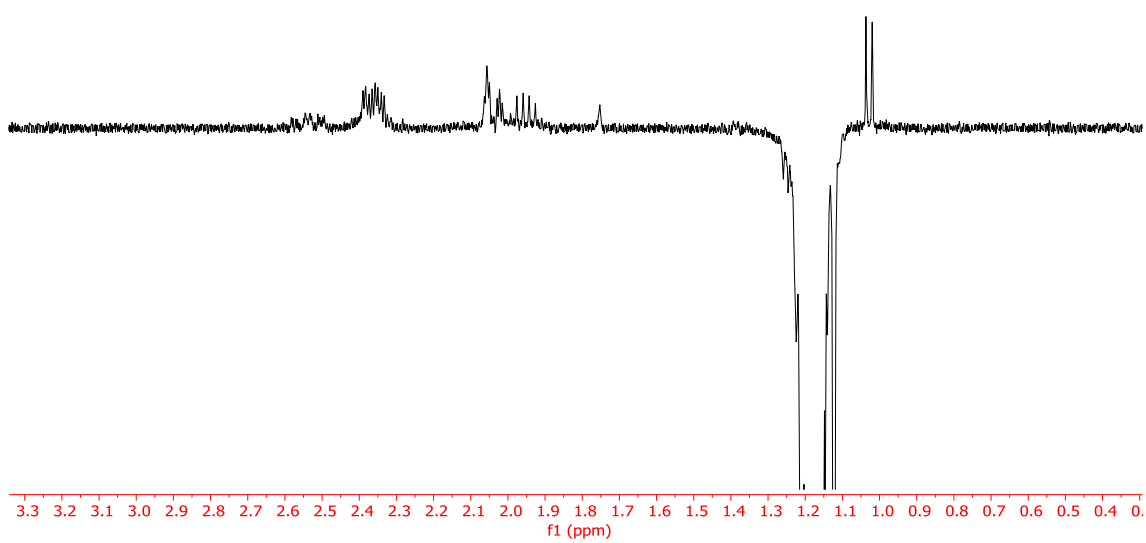



NOESY

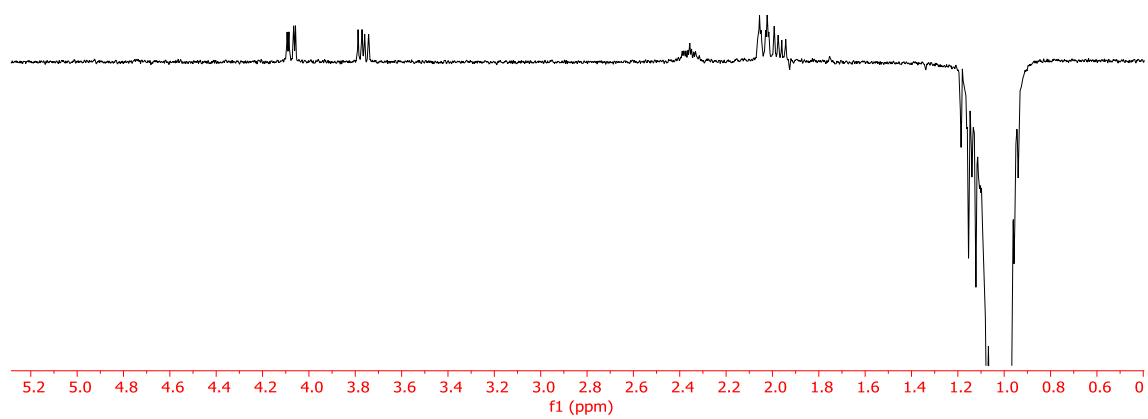

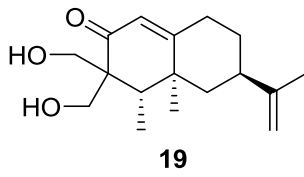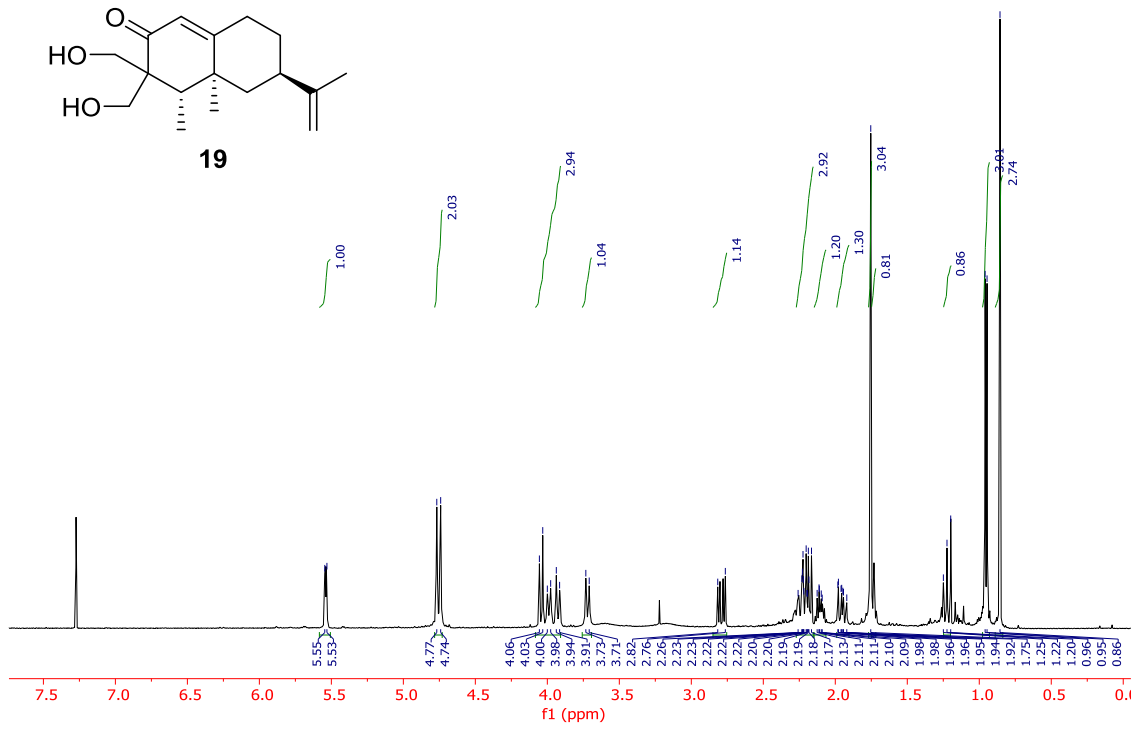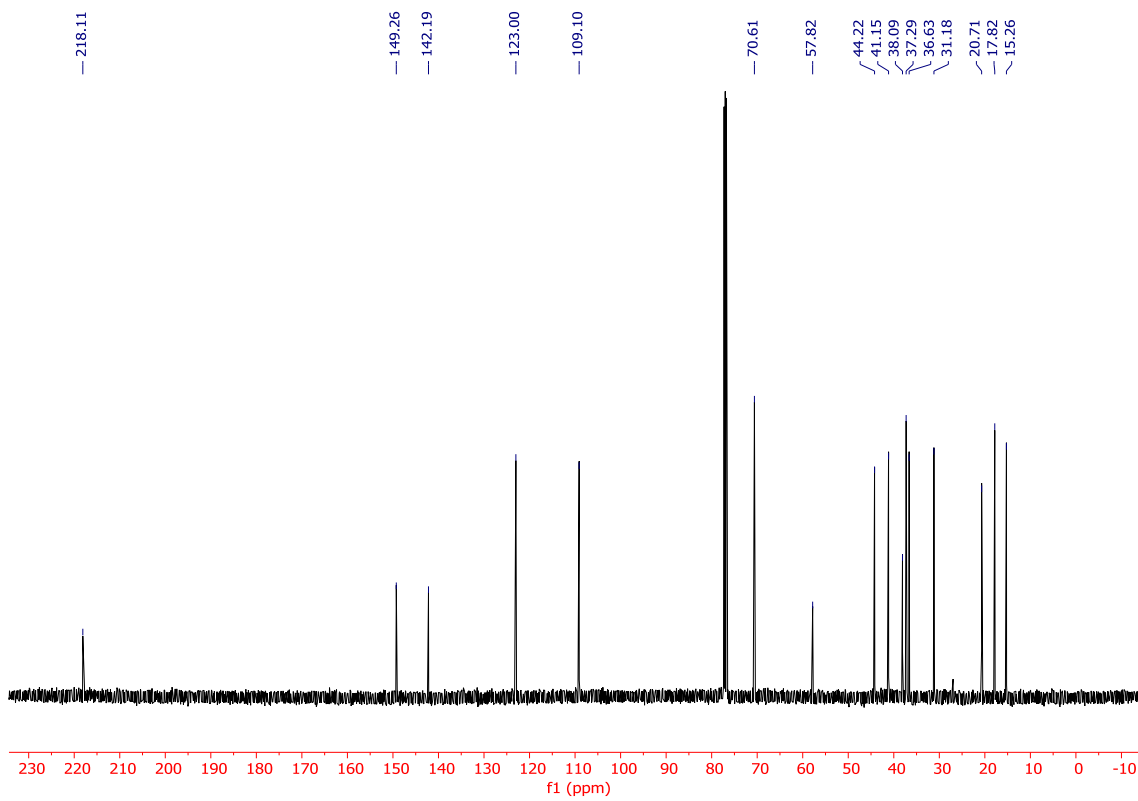

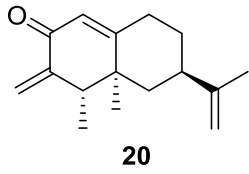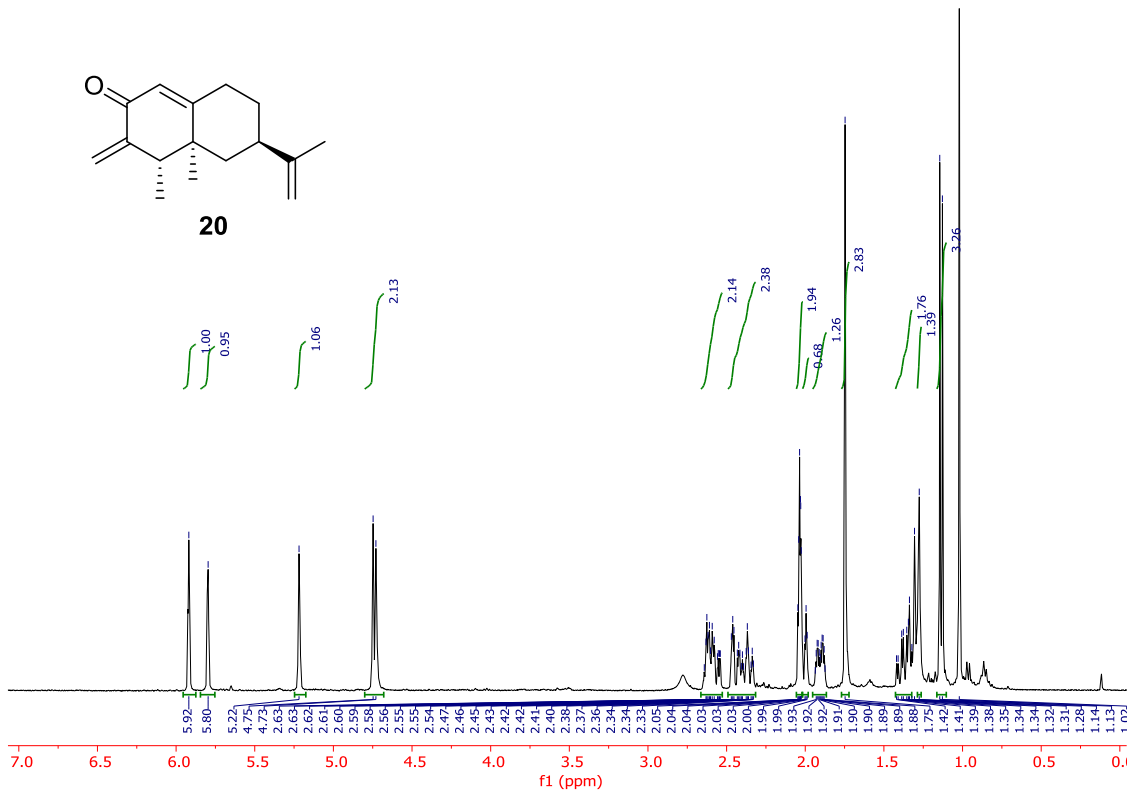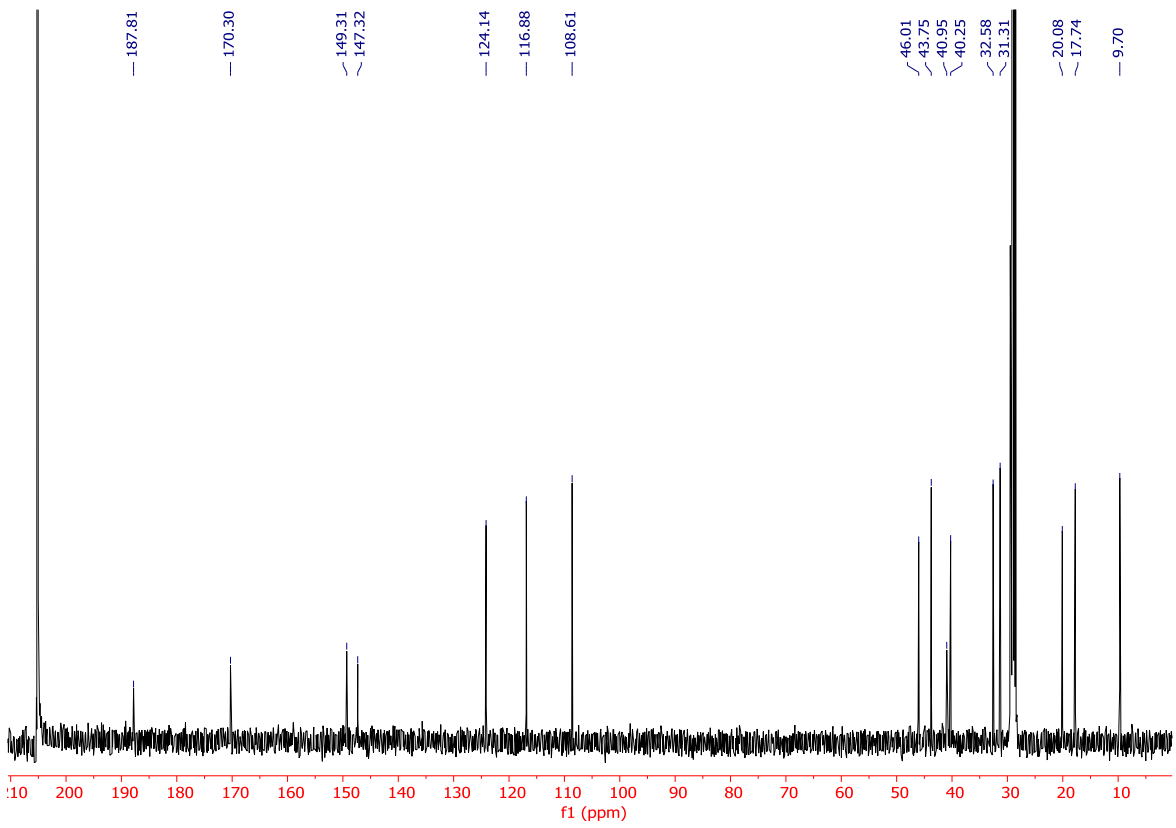

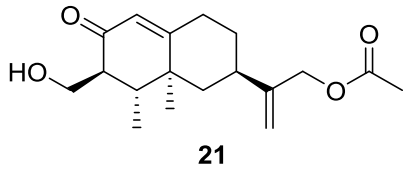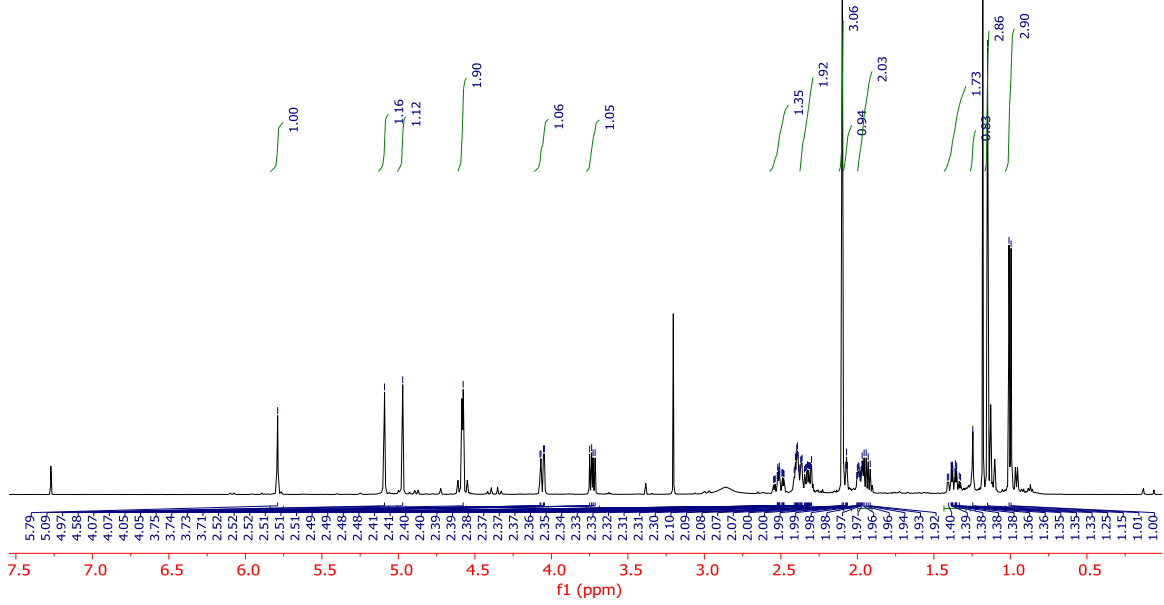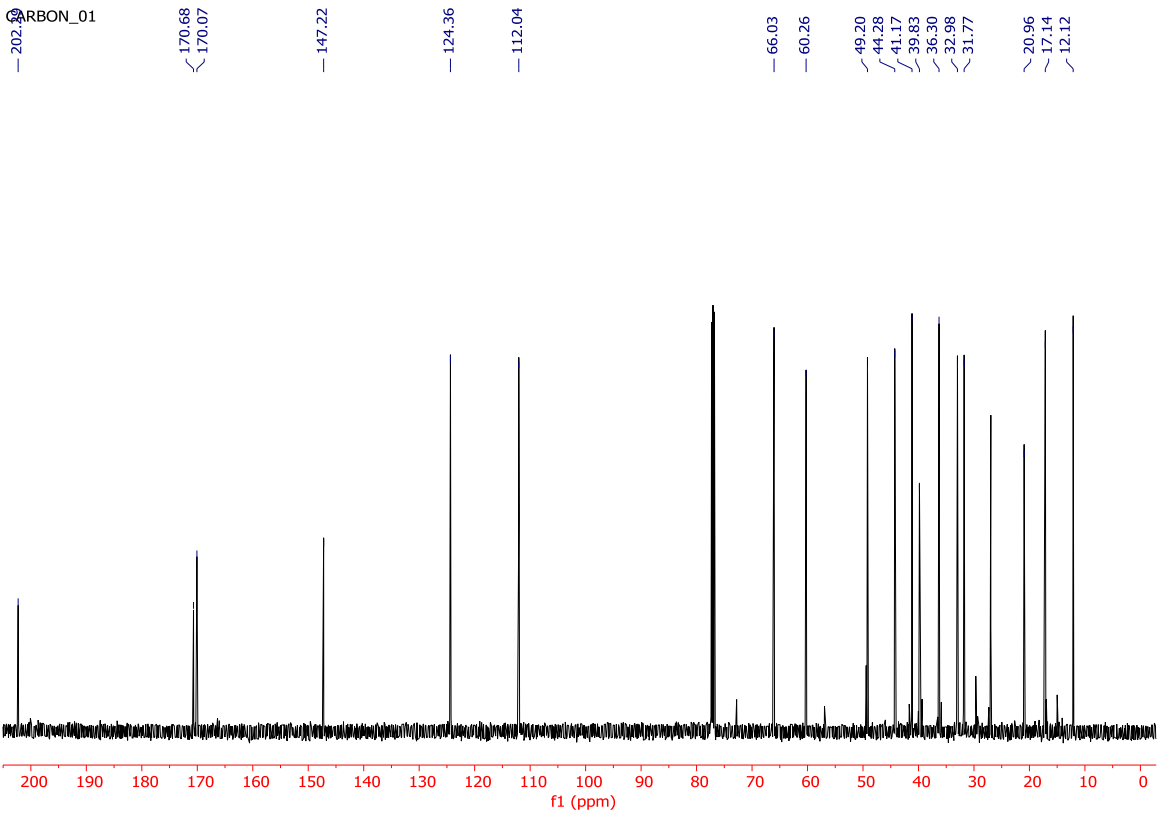

NOESY

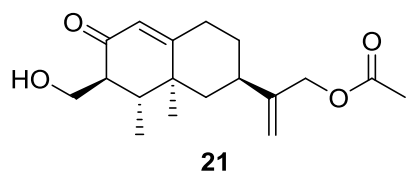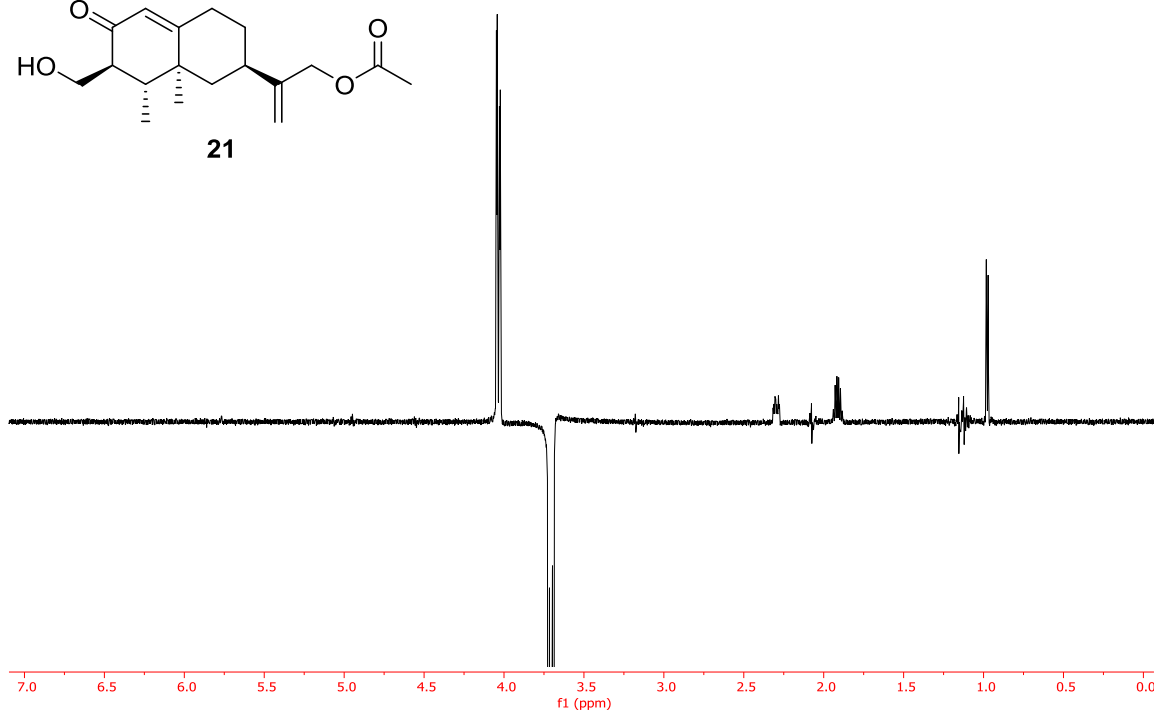

NOESY

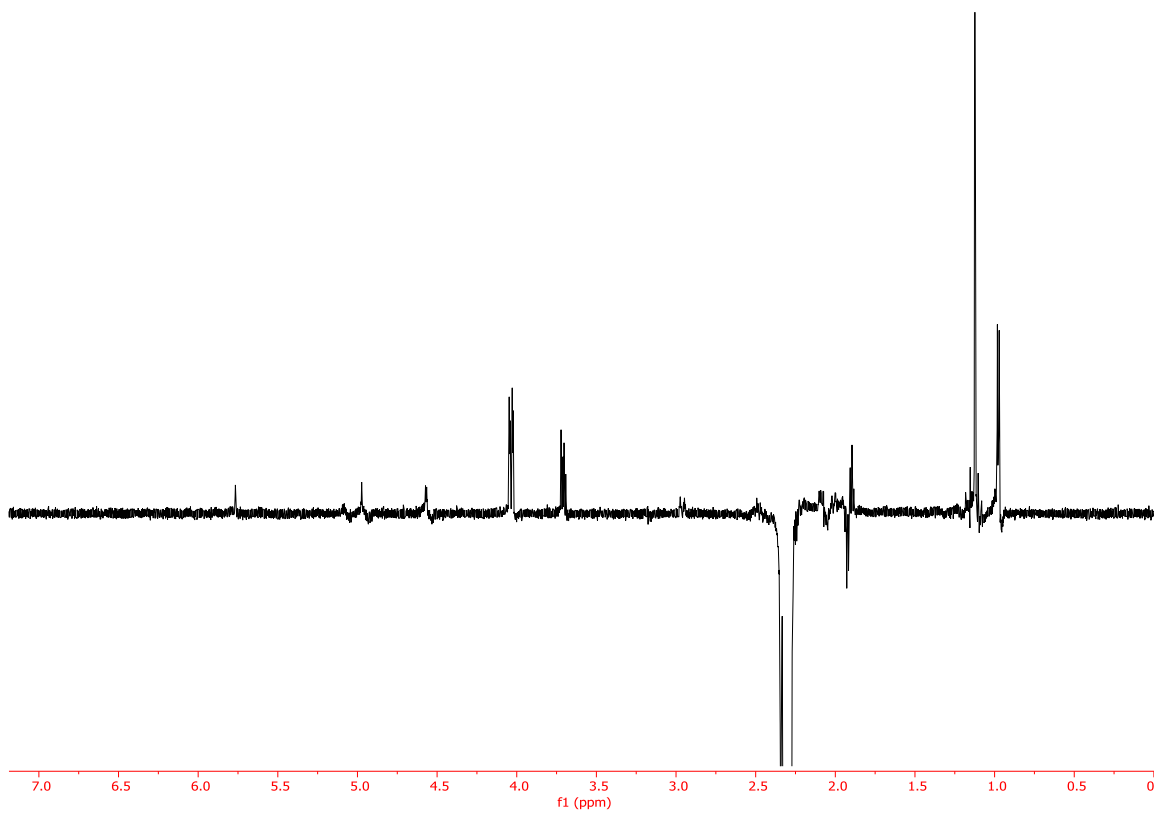

NOESY

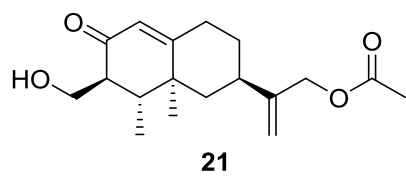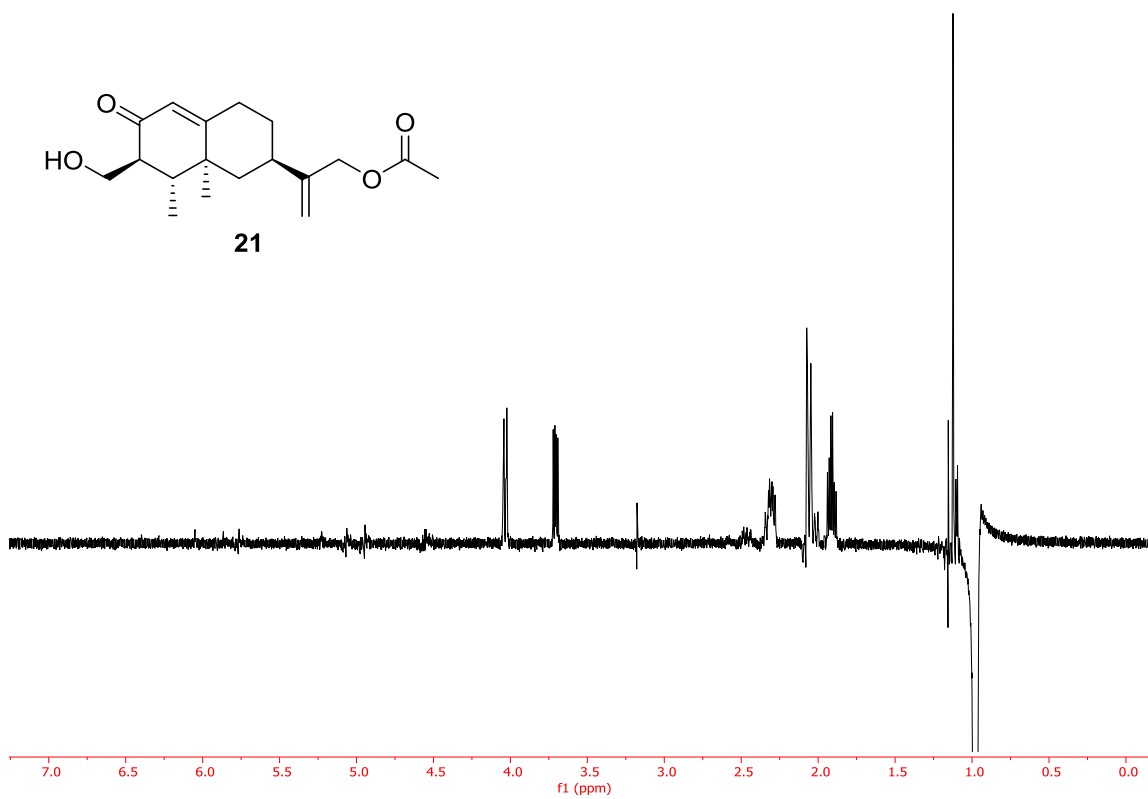

NOESY

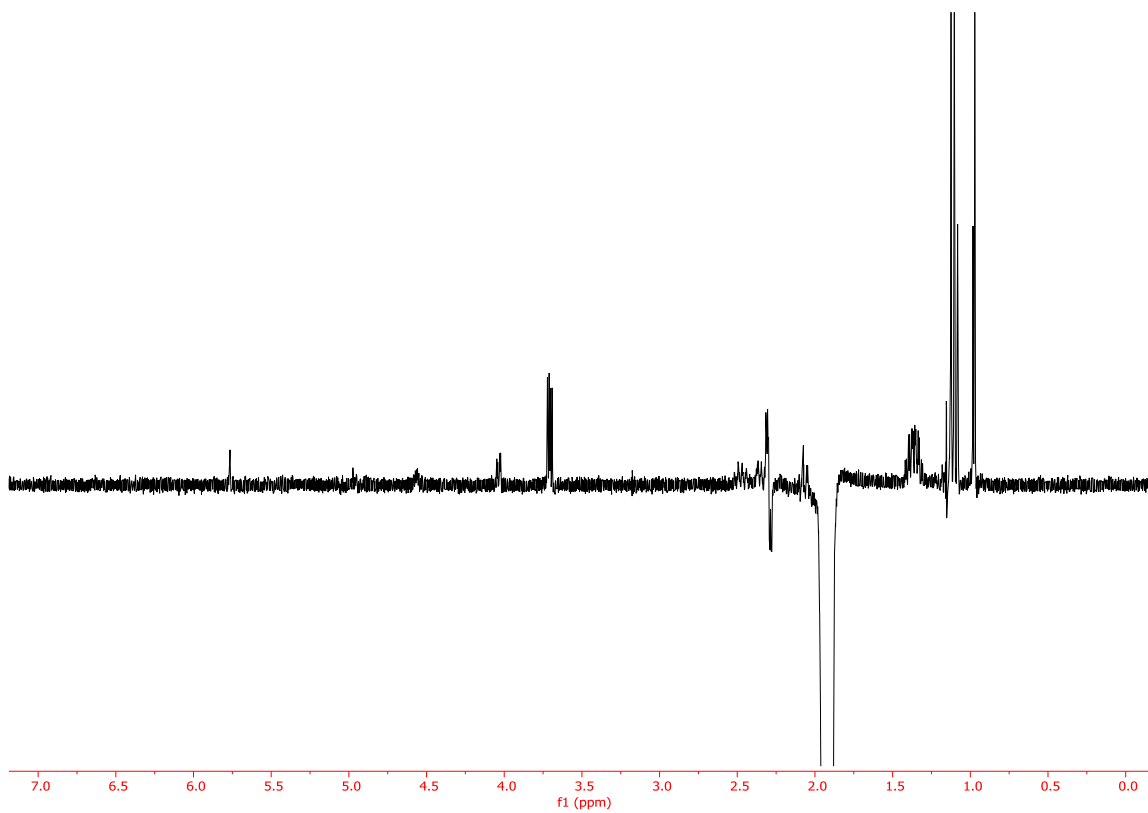

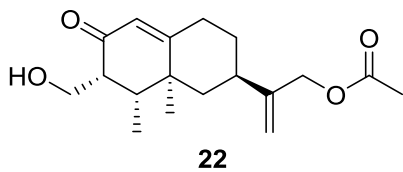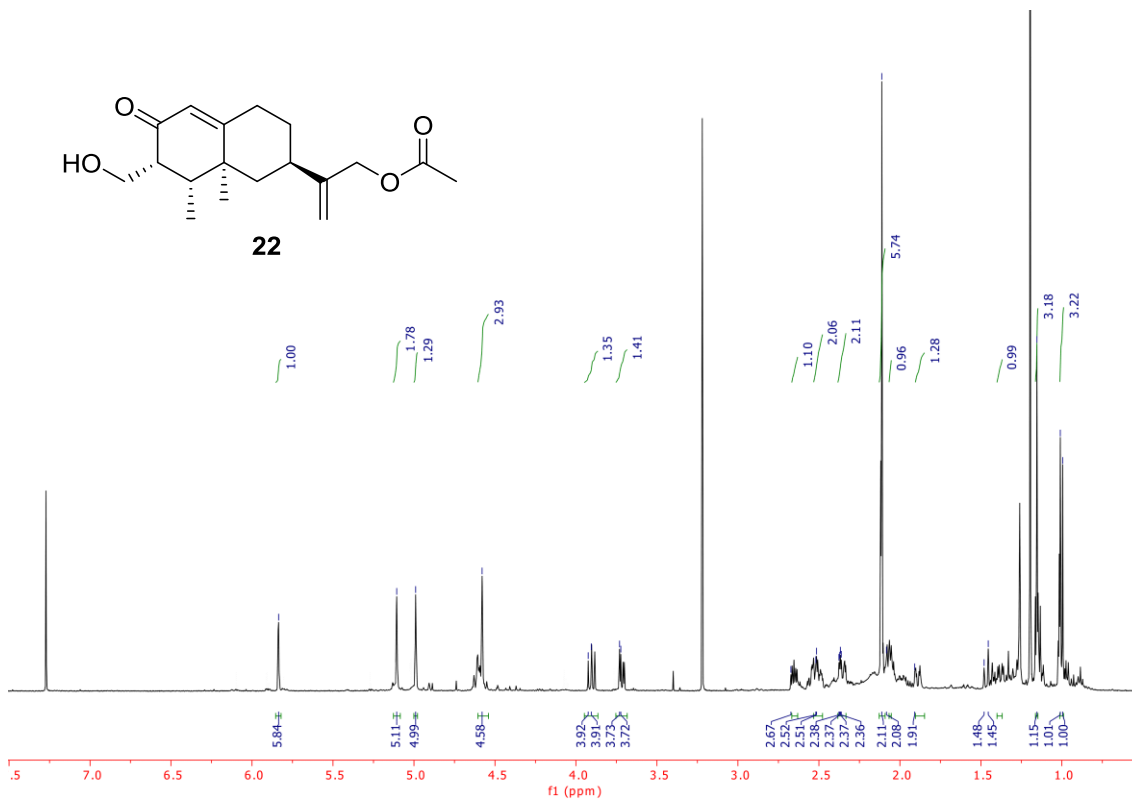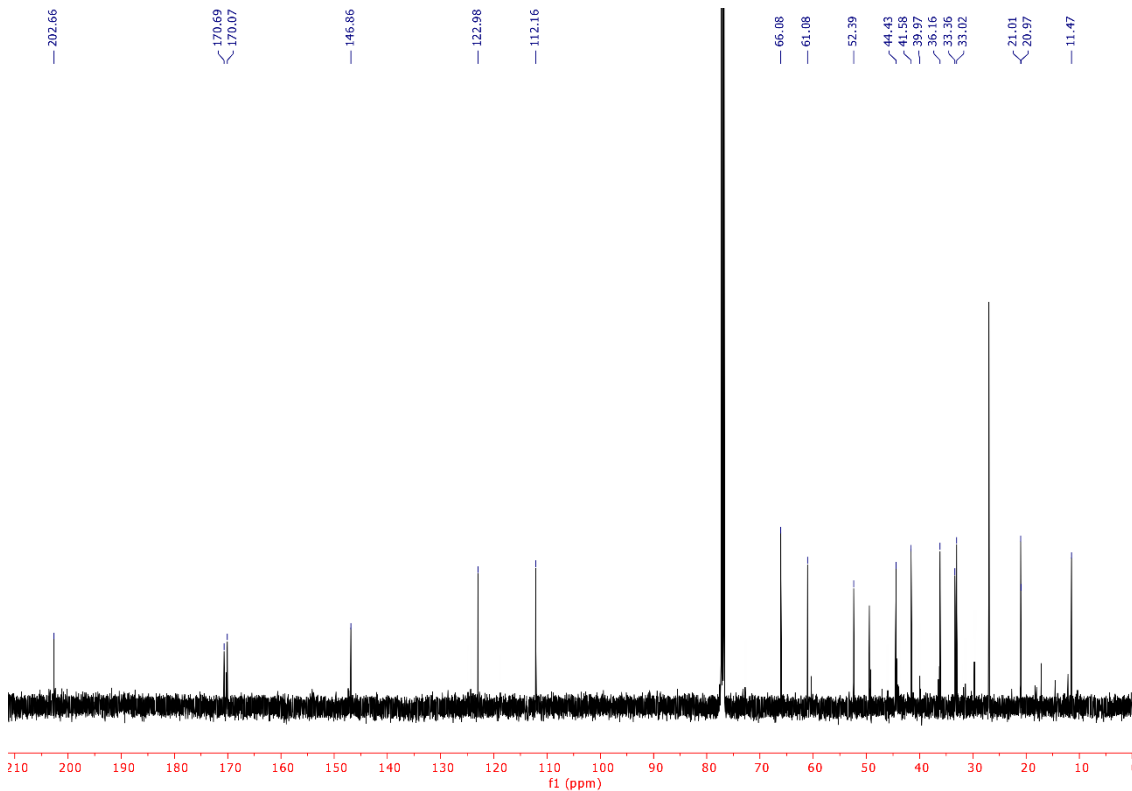

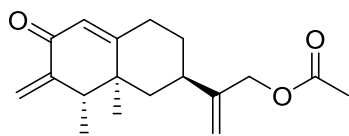

23

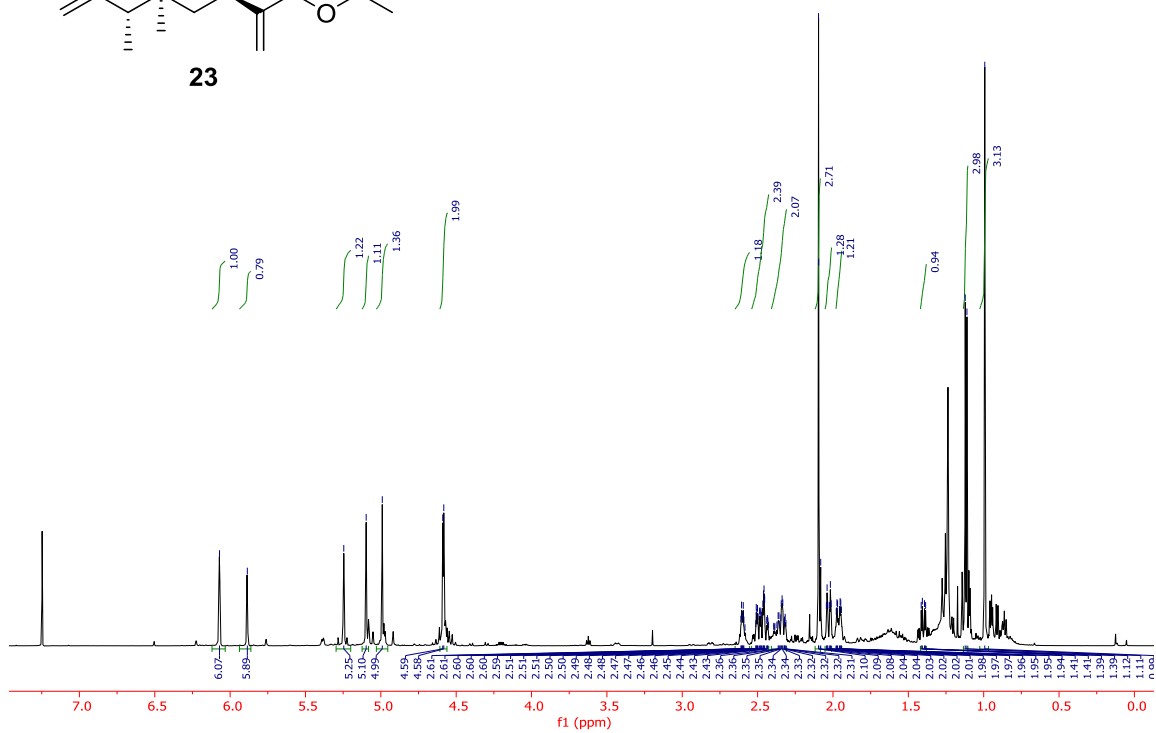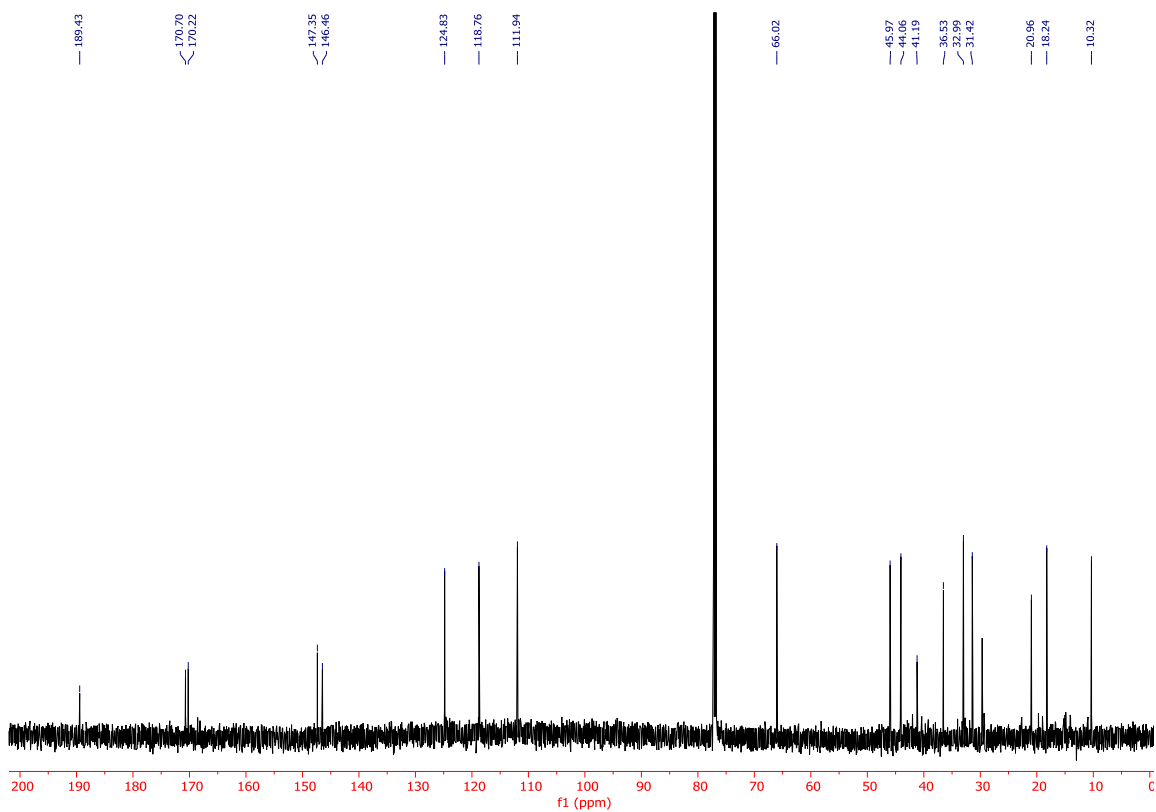

Supplement: biomolecules-09-00742-s001.pdf [file biomolecules-09-00742-s001.pdf]
